1 **Genome assembly, transcriptome and SNP database for chum salmon**

2 **(*Oncorhynchus keta*)**

3

4 **Eric B. Rondeau<sup>1,2,3\*</sup>, Kris A. Christensen<sup>1,2\*</sup>, Dionne Sakhrani<sup>1</sup>, Carlo A. Biagi<sup>1</sup>, Mike**

5 **Wetklo<sup>3</sup>, Hollie A. Johnson<sup>2</sup>, Cody A. Despins<sup>2</sup>, Rosalind A. Leggatt<sup>1</sup>, David R. Minkley<sup>2</sup>,**

6 **Ruth E. Withler<sup>3</sup>, Terry D. Beacham<sup>3</sup>, Ben F. Koop<sup>2</sup>, Robert H. Devlin<sup>1§</sup>**

7

8

9 <sup>1</sup>Fisheries and Oceans Canada, 4160 Marine Dr., West Vancouver, British Columbia, V7V 1N6,

10 Canada

11 <sup>2</sup>Department of Biology, University of Victoria, Victoria, British Columbia, V8W 3N5, Canada

12 <sup>3</sup>Pacific Biological Station, Fisheries and Oceans Canada, Nanaimo, British Columbia, V9T 6N7,

13 Canada

14

15 <sup>§</sup>Corresponding author

16 \*Authors contributed equally to results of manuscript

17

18 Email addresses:

19 EBR: [eric.rondeau@dfo-mpo.gc.ca](mailto:eric.rondeau@dfo-mpo.gc.ca)

20 KAC: [kris.christensen@wsu.edu](mailto:kris.christensen@wsu.edu)

21 DS: [Dionne.Sakhrani@dfo-mpo.gc.ca](mailto:Dionne.Sakhrani@dfo-mpo.gc.ca)

22 CAB: [Carlo.Biagi@dfo-mpo.gc.ca](mailto:Carlo.Biagi@dfo-mpo.gc.ca)

23 MW: [mike.wetklo@dfo-mpo.gc.ca](mailto:mike.wetklo@dfo-mpo.gc.ca)

24 HAJ: [holliej@uvic.ca](mailto:holliej@uvic.ca)

25 CAD: [cdespins@uvic.ca](mailto:cdespins@uvic.ca)

26 RAL: [Rosalind.Leggatt@dfo-mpo.gc.ca](mailto:Rosalind.Leggatt@dfo-mpo.gc.ca)

27 DRM: [dminkley@uvic.ca](mailto:dminkley@uvic.ca)

28 REW: [RWithler@shaw.ca](mailto:RWithler@shaw.ca)

29 TDB: [Terry.Beacham@dfo-mpo.gc.ca](mailto:Terry.Beacham@dfo-mpo.gc.ca)

30 BFK: [bkoop@uvic.ca](mailto:bkoop@uvic.ca)

31 RHD: [Robert.Devlin@dfo-mpo.gc.ca](mailto:Robert.Devlin@dfo-mpo.gc.ca)

32 **Abstract**

33 Chum salmon (*Oncorhynchus keta*) is the species with the widest geographic range of  
34 the anadromous Pacific salmonids. Chum salmon is the second largest of the Pacific salmon,  
35 behind Chinook salmon, and considered the most plentiful Pacific salmon by overall biomass.  
36 This species is of significant commercial and economic importance: on average the commercial  
37 chum salmon fishery has the second highest processed value of the Pacific salmon within British  
38 Columbia. The aim of this work was to establish genomic baseline resources for this species.  
39 Our first step to accomplish this goal was to generate a chum salmon reference genome  
40 assembly from a doubled-haploid chum salmon. Gene annotation of this genome was  
41 facilitated by an extensive RNA-seq database we were able to create from multiple tissues.  
42 Range-wide resequencing of chum salmon genomes allowed us to categorize genome-wide  
43 geographic variation, which in turn reinforced the idea that genetic differentiation was best  
44 described on a regional, rather than at a stock-specific, level. Within British Columbia, chum  
45 salmon regional groupings were described at the conservation unit (CU) level, and there may be  
46 substructure within particular CUs. Genome wide associations of phenotypic sex to SNP genetic  
47 markers identified two clear peaks, a very strong peak on Linkage Group 15, and another on  
48 Linkage Group 3. With these new resources, we were better able to characterize the sex-  
49 determining region and gain further insights into sex determination in chum salmon and the  
50 general biology of this species.

51

52 **Keywords**

53 Chum salmon, Genome assembly, *Oncorhynchus keta*, RNA-seq, Resequencing, SNP database.

54

55

56

## 57 **Background**

58 Pacific salmon of the genus *Oncorhynchus* are iconic, culturally important keystone  
59 species spawning across freshwater watersheds that feed the Northern Pacific Ocean.  
60 Predominately anadromous, members of most species spend years at sea, consuming marine  
61 nutrients that are eventually deposited into coastal ecosystems where they provide a valuable  
62 source of food to numerous marine and terrestrial species as the salmon spawn and then die  
63 [1].

64 Chum salmon (*Oncorhynchus keta*) are the second largest of the Pacific salmonids and  
65 may have historically represented up to 50% of the salmonid biomass in the Pacific Ocean [2]. It  
66 is the most widely distributed of the Pacific salmonid species [3, 4], with spawning grounds  
67 ranging from Japan and the eastern coast of the Korean Peninsula through to Northern Russia,  
68 and from the Mackenzie River south through Central California in North America [5]. Among  
69 the most significant species of Pacific salmon in commercial fisheries – in an analysis of British  
70 Columbian commercial fisheries 2012-2015, chum salmon was the most plentiful species by  
71 weight in 3 out of 4 years analyzed, and second most valuable by processed value when  
72 averaged across the four year period (\$31 million per year) [6].

73 A key and fascinating biological feature in salmonids is homing, whereby adults  
74 demonstrate an ability to return to the same riverine sites where they were spawned, although  
75 not all species show the same degree of site fidelity (reviewed in [7]). Some species, such as  
76 Sockeye, have been observed to return to within metres of where they were hatched (e.g., [8]),  
77 but other species vary in their fidelity to site of return and stray rate. Reasons for straying are  
78 likely varied (reviewed in [7]), but significant factors are thought to be juvenile freshwater  
79 residence time and freshwater migration distance, both of which lead to reduced imprinting.  
80 With chum salmon having relatively short freshwater residence (they migrate to sea as fry) and  
81 short migration distances (on average), it is perhaps not surprising that chum tend to have  
82 higher than average stray rates among the Pacific salmonids [7]. The consequences of such  
83 straying are that while regional-level differentiation (e.g., [9, 10]) and run-timing differentiation  
84 between summer and fall runs (e.g., [11–13]) can be observed, population-level genetic  
85 differentiation is not often seen within chum salmon.

86           The genomes of salmonids, including chum salmon, possess a key feature shared by all  
87 salmonid genomes, a salmon-lineage specific whole-genome duplications (WGD). WGDs very  
88 likely play one of the more significant roles in evolutionary innovation [14–17] and are found in  
89 plants (reviewed in [18] ), fungi [19, 20] , arthropods [21, 22], basal vertebrates ~500 million  
90 years ago (mya) [15, 23, 24], fishes ~300 mya [25–27], and more recently in ancestral salmonids  
91 ~90 mya [28, 29] . These major genome expansions have been proposed to allow for  
92 adaptations to new niches or conditions, particularly in times of major environmental change  
93 (reviewed in [30]). The occurrence of over 70 different salmonid species lineages stemming  
94 from the relatively recent ancestral WGD [29] offers a valuable system to i) observe  
95 evolutionary consequences of a relatively recent autopolyploid WGD, ii) identify ensuing  
96 mechanisms for regaining stable meiosis and cell division by regaining a functional diploid state  
97 through re-diploidization, and iii) draw associations between mechanisms of re-diploidization to  
98 potential genetic specialization that allow for species adaptation such as disease resistance.  
99 Additionally, each species has evolved unique morphology, life history strategies, and responses  
100 to common salmon pathogens (e.g., varied resistance to salmon aquaculture from pathogens  
101 such as the sea louse [31, 32]). This phenotypic variety provides future opportunities for  
102 exploring the biology and genetics behind the genomic architecture of whole-genome  
103 duplication have shaped these unique species.

104           The presence of these duplications, however, can present major technological  
105 challenges to genome assembly, due to limited differentiation between duplicated portions of  
106 the genome. Salmonids offer additional hurdles in that a significant portion of the genome still  
107 remains in a tetraploid-like state [33, 34], and may show lineage-specific re-diploidization  
108 patterns [35], or chromosome architecture through species-specific fusions [36]. While many  
109 challenges remain, the technological barriers to assembly of salmonid genomes are beginning  
110 to fall, as evidenced by the relatively rapid recent release of salmonid genomes [37–44]. A  
111 fully-annotated reference chum salmon genome will enhance development of genomics-based  
112 technologies to improve the effectiveness of fisheries management of the wild chum salmon  
113 fishery. This has already been performed for other Pacific salmon species in British Columbia

114 (e.g., [45, 46]), and a genome assembly for chum would provide the ability to adopt similar  
115 management tools based on emerging high-throughput sequencing technologies.

116 Genetic resources in chum salmon have, as in many other species, been in a state of  
117 transition as genetic tools have advanced and become more widespread. Early work on  
118 population genetic structure in chum salmon utilized allozymes [47, 48] and microsatellite  
119 markers [9, 49] and provided the first range-wide studies on genetic diversity [10]. Recently,  
120 genetic stock identification tools have been shifting from microsatellites to single-nucleotide  
121 polymorphisms (SNPs), providing increased accuracy of genetic discrimination with increasing  
122 marker numbers [50]. Early identification of SNPs in chum salmon [51–55] led to the  
123 development of a SNP panel for assessing genetic diversity and population structures in chum  
124 salmon [13]; development of expanded SNP panels for fisheries management continues to  
125 occur with increased marker density and improving genetic baselines allow for increased power  
126 ([56]; Beacham T.D. and Sutherland B.J.G, Personal Communication). Restriction-site Associated  
127 DNA sequencing (RADseq) has recently enabled a much more rapid throughput for SNP  
128 discovery [57, 58], and studies in chum have utilized this technique to enable researchers to  
129 develop linkage maps to explore regions of residual inheritance associated with the  
130 aforementioned genome duplication event [34]. This advance in technology has further allowed  
131 for the identification of extended patterns of linkage disequilibrium, demonstrating the power  
132 of increased marker density on the identification of genomic features of large effect [59].  
133 Despite this significant effort, unlike in other *Oncorhynchus* species (e.g., Rainbow trout [60];  
134 Chinook salmon [41], sockeye salmon [61]), neither a whole-genome catalog of SNP markers  
135 nor whole-genome resequencing data has been available as a resource for chum salmon to  
136 date. The development of such a resource will further allow genetic resources, such as SNP  
137 panels, to be placed in context relative to genes or other annotated genomic features.

138 In this work, we have sequenced and assembled the genome of a mitotic gynogen  
139 doubled haploid chum salmon to eliminate allelic variation but retain paralog differences.  
140 Extensive multi-tissue RNA-seq was generated to provide the base for annotation of the  
141 genome as well as a tissue-specific expression atlas for future comparative studies. Finally,  
142 whole-genome resequencing was performed across 59 individual chum salmon from a select

143 distribution of the species' range to catalogue genome-wide diversity in this species. The utility  
144 of the dataset is further demonstrated by the genetic association of the sex phenotype onto the  
145 expected chromosome in a narrow window of elevated linkage disequilibrium.

146

## 147 **Methods**

148

### 149 **Data availability**

150 All raw sequencing reads and the assembled genome described in this project have  
151 been submitted to NCBI under BioProject PRJNA556729. SNP variant sets described below are  
152 available through [Dryad repository](#).

153

**Comment [RE1]:** TBD on acceptance

### 154 **Animal care and sample collection**

155 All animals were reared in compliance with Canadian Council on Animal Care Guidelines, under  
156 oversight from the Fisheries and Oceans Canada Pacific Region Animal Care Committee  
157 (PRACC). Chum salmon for genome sequencing and assembly and for transcriptome assembly  
158 were from Chehalis River Hatchery parents and reared at Fisheries and Oceans Canada in West  
159 Vancouver. Chum salmon mitotic gynogen doubled haploids were produced following  
160 procedures described by [62]. Briefly, eggs were fertilized with UV-irradiated sperm and  
161 pressure shocked (10,000 psi for 5 minutes) in batches at 30 min intervals between 4 and 7  
162 hours post-fertilization. One individual from the 7h pressure shock group (Oke142-1, NCBI  
163 BioSample: SAMN12367893; Supplementary Table 1) was confirmed to be homozygous for  
164 maternal alleles using a panel of 14 microsatellites [49], and was used for genome sequencing  
165 and assembly (see below). The individual was euthanized in a bath of 200 mg/L tricaine  
166 methanesulfonate (TMS) buffered in 400 mg/L sodium bicarbonate prior to first feeding stage,  
167 and stored in ethanol before DNA extraction and whole genome sequencing.

168

169 For transcriptomic data, control Chehalis River Hatchery chum salmon produced from  
170 the same parents as Oke142-1 but without UV milt treatment or pressure shock were grown in  
171 aerated fresh well water in 200–3700 L tanks and fed hourly as fry and to satiation 3 times daily  
172 as parr with stage-appropriate manufactured salmon feed (Skretting Canada Ltd.). At  
173 approximately 7 months post-ponding, a single selected chum female (86.9g with a 19.3cm fork  
174 length) was euthanized with TMS as above, then rapidly (< three min, PRACC management  
175 procedure 3.7) team dissected to harvest 18 tissues (see Supplementary Table 2) for RNA  
176 extraction, with an additional tissue (testes) sampled from an juvenile male. All tissues were  
177 stored in RNAlater at -20°C until extraction. RNA extractions were performed using the Qiagen  
178 RNeasy Mini Kit following the manufacturer’s protocol.

179 For individuals used in resequencing, samples were obtained primarily through non-  
180 lethal sampling of fin clips or operculum punches from Fisheries and Oceans Canada hatchery  
181 brood programs. Additional samples were obtained from archived tissue sets used for genetic  
182 stock ID baseline development to supplement the dataset. In total, 59 individuals were utilized  
183 in this assessment, with DNA obtained via Qiagen DNeasy Animal tissue kit’s following  
184 manufacturer’s protocol) or phenol/chloroform extractions (following Thermo Fisher Scientific’s  
185 protocol for genomic DNA preparation [63]. Tissue types, sex, collection dates and locations are  
186 summarized in Supplementary Table 3.

187

### 188 **Genome sequencing and Assembly**

189 DNA was isolated from RNAlater or ethanol preserved tissues using a  
190 phenol/chloroform extraction as per Thermo Fisher Scientific’s protocol for genomic DNA  
191 preparation [63]. Extracted DNA was submitted for genome sequencing across multiple library  
192 types, using both Illumina and PacBio sequencing instruments (summarized in Supplementary  
193 Table 1: SRA chum Gynogen). Extracted DNA was submitted to the McGill University and  
194 Génome Québec Innovation Centre (now the Centre d’expertise et de services Génome  
195 Québec) for construction of overlapping (library size estimate = 497 base pairs (bp) and non-  
196 overlapping (library size estimate = 620bp) IDT dual-indexed Illumina Shotgun libraries. Each  
197 library was sequenced twice on an Illumina HiSeq2500 on RAPID mode PE250. Extracted DNA



198 was also submitted to the McGill University and Génome Québec Innovation Centre for  
199 construction of a single library of 10X Chromium linked-reads. Following library construction,  
200 the library was sequenced across three lanes of Illumina HiSeqX PE150. Extracted DNA was also  
201 submitted to the National Research Council Plant Biotechnology Institute Genome Core for  
202 Illumina mate-pair library construction and sequencing. Mate-pair libraries targeting 2-3kb, 4-  
203 6kb and 7-12kb were constructed, and sequenced on a lane each of Illumina HiSeq2500 PE125.  
204 Finally, extracted DNA was submitted to McGill University and Génome Québec Innovation  
205 Centre for construction of a Pacific Biosciences SMRT library using a sheared large insert library  
206 type, and the MagBead OneCellPerWell v1 collection protocol. The library was ultimately  
207 sequenced across 16 total SMRT cells.

208 Assembly protocols followed successful strategies utilized for Northern Pike e.g., [40, 61,  
209 64, 65]. See Supplementary Table 4 for specific parameters to assembly and trimming that were  
210 tested. Reads were first trimmed for quality, adapters and minimum length using Trimmomatic  
211 [66], and BBmap's FilterByTile was utilized to remove poorly performing portions of the  
212 Illumina reads (<https://jgi.doe.gov/data-and-tools/bbtools/bb-tools-user-guide/bbmap-guide/>;  
213 [67]). Allpaths-LG v52488 [68] was utilized with overlapping Illumina overlapping PE250 and  
214 Illumina mate-pair libraries using a 3.0 TB memory node on the Compute Canada cluster Cedar.  
215 Non-overlapping libraries were also included in two assembly attempts, but ultimately  
216 exceeded the memory availability on the node in the MergeNeighbourhoods2 module and  
217 were dropped in successful assemblies. Assembly parameters were primarily adjusted for  
218 coverage of each of the library types as had been performed in other species; additional  
219 modifications were made to read filtering to improve the assemblies.

220 Following Allpaths-LG assembly, scaffolds were passed into PB Jelly 2 v 15.8.24 [69]  
221 along with all subreads produced in PacBio sequencing. Nodes on Compute Canada's Cedar  
222 cluster were used for all stages, with on-node temp directory and 48 cores used in all steps  
223 where allowed. Blasr parameters were ``-minMatch 8 -sdpTupleSize 8 -minPctIdentity 75 -bestn  
224 1 -nCandidates 10 -nproc 48 -maxScore -500 -noSplitSubreads``. Extraction.py was modified to  
225 ``MAXGAPHOLD= 1000000`` to take advantage of memory available. Collection.py was run with  
226 ``-m 3``. All other parameters remained default. Finally, the assembly was polished with Pilon

227 [70] using the trimmed paired-end data, aligned to the genome utilizing `bwa mem -M` and  
228 default parameters.

229         Scaffolds were ordered and oriented into chromosome representations (i.e.,  
230 Pseudomolecules) predominately following the methods described in Christensen et al. (2018)  
231 [40]. The sequences underlying the markers for the published chum linkage map from Waples  
232 et al. (2016) [34] were aligned to the scaffold assembly utilizing BLAST (-outfmt 6, -word\_size  
233 48, perc\_identity 94, -max\_hsps 100, -max\_target\_seqs 10 -evaluate 1E-16). All scaffolds with a  
234 link to at least one marker on the map were retained for subsequent pseudomolecule inclusion.  
235 Scaffolds were ordered and oriented to the extent allowed by the linkage map, although  
236 regions of low recombination limited the effectiveness of the maps alone at this task.  
237 Therefore, the sequences underlying the markers for the linkage map were also aligned to a  
238 higher contiguity genome of a related species (coho; GCF\_002021735.2), and ordering and  
239 orientation was further refined based on the conserved synteny between the two species via  
240 manual review. Where discrepancies were observed, the chum linkage map was taken as  
241 correct to ensure major species-specific rearrangements were captured. Finally,  
242 pseudomolecules were aligned to genomes of additional salmonids rainbow trout  
243 GCF\_002163495.1 [39], Atlantic salmon (GCF\_000233375.1) [38], Chinook salmon  
244 (GCF\_002872995.1) [40] and the non-duplicated outgroup to the salmonids, northern pike  
245 (GCF\_000721915.3) [71] using Symap v4.2 [72] to ensure linearity was generally conserved, and  
246 where it was not, was supported by rearrangements observed in the linkage map.

247         A BUSCO v4.0.2 [73] analysis utilizing the actinopterygii\_odb10 dataset and `-m geno -c  
248 10 -sp zebrafish` was used to analyze the gene representation within the assembly utilizing the  
249 RefSeq maintained assembly: GCF\_012931545.1.

250

## 251 **Gene Annotation**

252         Raw reads for RNA-seq libraries were uploaded into NCBI under BioProject  
253 PRJNA556729 for inclusion in the Eukaryotic Genome Annotation pipeline. NEBNext dual-  
254 indexed mRNA stranded libraries were constructed from tissues described above by the McGill  
255 University and Génome Québec Innovation Centre, and sequenced on a half lane of NovaSeq

256 6000 S4 PE150 (additional libraries in the lane consisted primarily of RNA-seq of Pink and  
257 Chinook salmon from related projects). Sequences were uploaded under: SRP216443, with  
258 individual accessions: SRR9841162 (Adipose), SRR9841163 (Brain), SRR9841160 (Gill),  
259 SRR9841161 (Head Kidney), SRR9841166 (Heart), SRR9841167 (Hindgut), SRR9841164 (Left  
260 Eye), SRR9841165 (Liver), SRR9841168 (Lower Jaw), SRR9841169 (Midgut), SRR9841171  
261 (Ovary), SRR9841172 (Pituitary), SRR9841170 (Pyloric Caeca), SRR9841174 (Red Muscle Skin),  
262 SRR9841176 (Spleen), SRR9841177 (Stomach), SRR9841173 (Testes), SRR9841175 (Upper Jaw  
263 Nares), and SRR9841178 (White Muscle).

264

### 265 **Variant Calling**

266 All individuals sequenced for variant calling (Supplementary Table 3) used Shotgun PCR  
267 Free IDT dual-indexed Illumina libraries, produced on a quarter lane of Illumina HiSeqX – library  
268 construction and sequencing were performed at the McGill University and Génome Québec  
269 Innovation Centre. Raw reads were uploaded to the NCBI BioProject PRJNA556729, with  
270 individual accessions listed in the supplementary table.

271 Variant calling followed the best practices pipeline of GATK 3.8 [74–76], and generally  
272 followed the methods previously outlined in Christensen et al. (2020) [61]. Raw paired-end  
273 reads were aligned to the scaffold-version of the genome (pre-pseudomolecule construction)  
274 using bwa (v0.7.17) mem [77] and the `-M` option. Samtools (v1.9) [78] was used to sort and  
275 index the alignment files, while Picard (v2.18.9) [79] was utilized with the MarkDuplicates  
276 option to identify likely PCR duplicates, and with ReplaceSamHeader to add read group  
277 information to the alignment files. GATK's HaplotypeCaller was then used `--genotyping_mode`  
278 `DISCOVERY --emitRefConfidence GVCF` to generate gvcf files, GenotypeGVCFs was used to  
279 generate vcf on intervals, and CatVariants was used to concatenate interval files into a single  
280 vcf. A training variant set was generated using a hard-filtered subset of the first round of  
281 genotyping, utilizing VariantFiltration and the parameters `--filterExpression "QD < 2.0 || FS >`  
282 `60.0 || MQ < 40.0 || MQRankSum < -12.5 || ReadPosRankSum < -8.0"` as well as the VCFtools  
283 (v0.1.14) [80] parameters `--maf0.1 --hwe0.01`. A truth set was generated by overlapping the  
284 linkage map SNPs with the hard-filtered training set to obtain SNPs found in both methods.

285 VariantRecalibrator was applied using these sets ``-mode SNP -an QD -an MQ -an MQRankSum -`  
286 `an ReadPosRankSum -an FS -an SOR -an InbreedingCoeff``, and ApplyRecalibration run to  
287 generate a final SNP set ``--ts_filter_level 99.0``. Finally, as SNP calling began pre-  
288 pseudomolecule construction, vcfChromTransfer in the Genomics General repository  
289 ([https://github.com/simonhmartin/genomics\\_general](https://github.com/simonhmartin/genomics_general); commit: 9d12505) was used to lift over  
290 the VCF file based on the NCBI submission AGP file. This lifted-over VCF is included in the  
291 accompanying dataset as the “raw SNP” set (referred to as set 1 below).

292 VCFtools v1.14 [80] ``--maf 0.05 --max-alleles 2 -- min-alleles 2 --max-missing 0.9 --`  
293 `remove-filtered-all --remove-indels`` was used to retain only bi-allelic markers with little missing  
294 data and remove the rarest variants (referred to as set 2). The next filter utilized the  
295 VCF.Filter.v1.0.py script [61] to remove variants with allelic imbalance ``-ab 0.2``, followed by  
296 VCFtools to select only the 37 pseudomolecules ``--chr`` (referred to as set 3). The final filter  
297 utilized BCFtools v.1.9 to filter variants for LD in a 20kb window ``+prune, -w 20kb, -l 0.4, -n 2``  
298 (referred to as set 4). Finally, VCFtools ``-relatedness2`` was run to detect closely related  
299 individuals. In light of the results, individuals ``Oke180104-Fert164`` and ``Oke171107-D`` are  
300 recommended to be used cautiously in further analysis as they were deemed most likely to be  
301 haploid progeny (expected) and sibling (unexpected) respectively of other individuals in the  
302 analysis (can be applied to all sets prior to further analysis using ``vcftools --remove``; removed  
303 for Figure 3 below, not removed in Figure 2).

304

### 305 **SNP dataset analyses**

306 SNPhylo [81] was run on the “set 4” dataset, using additional options ``-m 0.05 -P`  
307 `Oket_chroms_37_Id0.2 -b -B 1000 -a 37`` in order to generate a bootstrapped phylogenetic tree  
308 of the chum salmon. Visualization was performed using the Figtree V1.4.4 package  
309 (<http://tree.bio.ed.ac.uk/software/figtree/>). PCA analyses were performed on the same dataset  
310 using the R package ``SNPrelate``, with full and Canadian-only sample sets plotted– the set 3 is  
311 visualized in this work, with all visualization performed using the `ggplot2` package [82].

312 The sex phenotypes associated with re-sequencing samples (Supplementary Table 3)  
313 were utilized as the basis for a genome-wide association analysis for sex. Utilizing the allele

314 balanced SNP set (“set 2” above), VCFtools v1.14 was used to generate input for plink  
315 (chromosomes only). An association test was run in PLINK 1.9 [83] using the formatted output  
316 data, and resulting Manhattan plot visualized in R [84] using the qqman package [85]. Further  
317 visualization of identified SNPs were performed using the Adegenet package [86]. Counts of  
318 coverage utilized samtools v1.9 depth, using default parameters to calculate genome wide  
319 coverage over each individual \*.bam alignment file, and using the `-b`` option to restrict the  
320 calculation to only the region of the growth hormone 2 gene (*GH2*) demonstrating elevated  
321 coverage in the males following a manual review of the alignments using IGV viewer 2.9.4 [87].

322 Duplicated regions, presumably from the Salmon specific 4R duplication event, were  
323 identified by alignments using the default settings of SyMap v4.2 [72], using a repeat-masked  
324 version of the genome following prior methods [61], by masking WindowMasker-based  
325 repetitive regions using `sed -e '/^>/! s/[[:lower:]]/N/g`` from the RefSeq genome. Summary  
326 tracks were predominately generated using scripts from [40]: Orientation of the blocks were  
327 generated using `Analyze_Symap_Block_Orientation.py`; percent identity was determined using  
328 `Analyze_Symap_Linear_Alignments.py`; percent identify of repetitive regions identified using  
329 `Percent_Repeat_Genome_Fasta.py`. Linkage map markers from “Map 1” in [34] were aligned to  
330 the genome as previously described above using BLAST. Linkage disequilibrium (LD) was  
331 interpreted using the `--geno-r2`` option in VCFtools [80], and outputting only for those  
332 comparisons exceeding `--min-r2 0.5`` in order to identify the most highly linked SNPs –  
333 summaries were further limited to single chromosomes using the `--chr`` option. LD calculations  
334 utilized the allele balanced set (set 3) described above. LD track utilized counts of markers in  
335 linkage disequilibrium across at least 100kb, and summarized as a log sum per 1 million base  
336 pairs. Circos v0.69.9 [88] was utilized to visualize the data tracks described.

337 Heterozygosity analyses followed the same parameters and method as in [61]. Runs of  
338 homozygosity were identified from the variants that had been filtered for allele balance using  
339 PLINK v1.9 (parameters: `--homozyg`) [83]. The number of heterozygous genotypes and  
340 alternative homozygous genotypes per individual were counted using the same custom script  
341 described in the supplementary data of the sockeye genome [61]. Heterozygotes per kbp was  
342 calculated as the number of heterozygous genotypes divided by the total nucleotides in the

343 genome (1,853,104,330) multiplied by 1 kbp. The heterozygosity ratio was calculated as the  
344 number of heterozygous genotypes divided by the number of alternative homozygous  
345 genotypes.

346

## 347 **Results and Discussion**

### 348 **Genome Assembly and Annotation**

349 From a raw data set consisting of 59X coverage (110 billion bp) of overlapping 250bp  
350 Illumina reads and 60X coverage (114 billion bp) of total mate-pair Illumina reads of three insert  
351 sizes (2, 5 and 8kb mean), multiple assembly attempts were performed varying the parameters  
352 on read depth as well as read-trimming. Ultimately, three of the attempts resulted in a  
353 completed assembly (see Table 1), with the final attempt being the most successful, with a  
354 contig N50 of 13.1 kb and a scaffold N50 of 653 kbp. Following AllPaths-LG assembly, contig  
355 gaps were filled utilizing PB Suite and 53 billion bp of Pacific Biosciences Sequel long-reads.  
356 Following Pilon polishing, utilizing the short insert Illumina libraries, scaffolds were organized  
357 into pseudomolecules representing the 37 chromosomes in chum salmon, predominately  
358 guided by the publicly available linkage map [34]; ultimately, the linkage map allowed for 70%  
359 of the genome assembly to be assigned to a linkage group, slightly lower but approximately  
360 equivalent to prior attempts in salmonids using equivalent techniques (e.g., [40, 61]). The final  
361 assembly was uploaded to NCBI under BioProject PRJNA556729 and ultimately was included in  
362 the RefSeq database as GCF\_012931545.1.

363 Busco scores indicate that most of the genome is represented within the family, with  
364 results similar to what has been seen in Sockeye, with 85.0% complete (25.1% duplicated), 3.2%  
365 fragmented and 11.8% missing. This likely reflects the slightly more fragmented nature of the  
366 genome as compared to prior attempts using the same technology in other species. We believe  
367 this is most likely due to some minor shearing observed in the DNA utilized for library  
368 preparation. We did attempt to use 10X chromium data as part of this assembly process, but,  
369 our scaffolding power was negligible – after review, it is likely that DNA shearing noted in the  
370 bioanalyzer trace prior to library construction limited the size of the fragments from which to

371 generate the linked reads, thus limiting scaffolding power. The raw data from this attempt is  
372 included under the BioProject (see Supplementary Table 1), but further attempts would need to  
373 use a separate individual in order to increase length of the starting material. Given that  
374 sequencing and assembly technology has advanced rapidly since we began this project, it is  
375 likely further efforts to improve the genome may benefit from the use of long-read  
376 technologies, where incredible advances in contiguity have already been demonstrated in  
377 salmonids [44, 89]. Indeed, a long-read assembly for chum salmon is planned by the authors,  
378 and will eventually replace this reference, in due course.

379       Following inclusion in the RefSeq database, the genome was annotated utilizing the  
380 NCBI Eukaryotic Annotation pipeline, ultimately yielding Annotation Release 100  
381 ([https://www.ncbi.nlm.nih.gov/genome/annotation\\_euk/Oncorhynchus\\_keta/100/](https://www.ncbi.nlm.nih.gov/genome/annotation_euk/Oncorhynchus_keta/100/)) – see  
382 Table 2 for a summary. Gene annotation, via chum-specific reads, primarily utilized the 19  
383 tissue RNA-seq dataset sequenced as part of this work (see Supplementary Table 2), with  
384 additional contribution of sequences from two additional datasets with publicly accessible RNA-  
385 seq data [90, 91]. Overall, gene numbers are comparable to other salmonid genomes, and thus  
386 likely reflect a relatively complete representation of the coding sequence. It is likely that a  
387 future genome that utilized long-reads would result in a slightly increased number of genes (as  
388 observed between *Oncorhynchus kisutch* Annotation releases 100 and 101, for example).

389       The resulting assembly is summarized visually in Figure 1. Duplicated regions, as  
390 identified via self-alignment using Mummer [92] reflect re-diploidized segments of the genome  
391 from the salmon-specific 4R duplication event. There are observations of elevated percent  
392 identity on the ends of some chromosomes (Figure 1) that demonstrate partial re-diploidization  
393 as in Waples et al. (2016) [34] (e.g., LG05 and LG32), but the effect is not nearly as extensive as  
394 that observed in other species. The repetitive elements identified by Window Masker were  
395 elevated in regions likely overlapping with centromeres based on synteny with other species for  
396 which chromosome arms have been described (Figure 1). Figure 1 also shows Map 1 from  
397 Waples et al. (2016) [34] (which can be further visualized in more detail in Supplementary  
398 Figure 1 and map 2 in Supplementary Figure 2), and demonstrates the co-linearity of the map  
399 with the pseudomolecules. As the maps do contain regions of low-recombination, much of the

400 ordering and orientation of the scaffolds into pseudomolecules (but crucially, not the  
401 assignment to the pseudomolecule itself) relies heavily in some positions on the long-read and  
402 Hi-C based assembly of coho salmon (GCF\_002021735.2). Given the extensive conserved  
403 synteny and co-linearity between orthologous salmonid chromosome arms demonstrated  
404 elsewhere (e.g., [36, 40]), this would appear to be a reasonable approach, and has been part of  
405 the development of pseudomolecules for short-read assemblies in salmonids previously (eg.  
406 [40]). Regions of the genome with high LD generally overlap with regions of reduced  
407 recombination as observed in the linkage map (Figure 1). Further exploration of regions of high  
408 LD can be observed in Supplementary Figures 3 and 4.

409       As a final clarification on the assembly presented, we note that pseudomolecules have  
410 been named within the publicly available assembly based on the linkage group naming  
411 mechanism in Waples et al. (2016), [34] to allow for direct comparison between the two works.  
412 However, the authors also note, and are enthusiastic about, the naming convention suggested  
413 by Sutherland et. al., [36] to describe chromosomal arms, and indeed the adoption of the  
414 system into the grayling genome assembly [42]. We provide here in Table 3 the naming for the  
415 pseudomolecules that could be suggested by such a system. While the pattern of fusions do  
416 make this system less than ideal, and the resulting chromosome names are somewhat  
417 unwieldy, we provide them here as a quick reference and potential guide to re-naming of the  
418 linkage groups should such a system continue to prove popular as future assemblies are  
419 released. Presenting both names here will hopefully ease future reference, whichever naming  
420 scheme ends up being formally adopted in future works.

421

#### 422 **Population level variation**

423       Given the extensive distribution of chum salmon, attempts were made to maximize  
424 geographic distribution of the samples selected within the study. We were able to take  
425 advantage of an extensive collection of samples [10] in the archive of the Molecular Genetics  
426 Lab (Pacific Biological Station, Fisheries and Oceans Canada), combined with more recent  
427 contributions from various Fisheries and Oceans Canada hatchery staff for recent brood. While  
428 the collection is focused on British Columbia, the addition of the Japanese samples originating



429 from the Tokushibetsu River on the Island of Hokkaido give a glance at the degree of variation  
430 expected across the Pacific. Samples and available metadata are summarized in Supplementary  
431 Table 3. In total, 15,372,999 nucleotide variants have been described with this data in the raw  
432 dataset, with described filters leaving 8,868,081 in set 2, 2,135,295 in set 3, and 94,080 in set 4.  
433 A summary of statistics by individual is given in supplementary table 5 [61]. On average (and  
434 ignoring the haploid individual), total lengths of runs-of-homozygosity (ROH) averaged 12.4  
435 Mbp [0 - 40.8 Mbp as determined using default parameters]. Heterozygous SNPs per 1kbp  
436 averaged 1.47 (Standard Deviation = 0.15), while the heterozygosity ratio averaged 2.23  
437 (Standard Deviation = 0.45). Overall, results are relatively similar to what was observed utilizing  
438 a parallel analysis in Sockeye salmon, although the overall length of ROH is lower (12.4 Mbp in  
439 chum salmon vs. 35.5 Mbp in Sockeye salmon), whereas heterozygous SNPs per 1kbp are  
440 increased (1.47 in chum salmon vs. 0.67 in Sockeye salmon), and the heterozygosity ratio was  
441 approximately equivalent (2.23 in chum salmon vs. 2.21 in sockeye salmon after removing  
442 outliers). Deviations below the mean for both heterozygosity calculations were predominately  
443 associated with average coverage, implying that depth of sequencing likely impacted to some  
444 extent these calculations. Regardless, we demonstrate in chum salmon that there is a general  
445 increase in heterozygosity as compared to sockeye salmon, and establishes a comparative  
446 metric to be carried through to future comparative analyses in other Pacific salmonids.

447 Analyses of the SNP set resulting from whole genome resequencing (targeted coverage  
448 of 15X) should be considered exploratory, as collections were focused on geographic coverage  
449 to maximize variants within the catalogues rather than addressing additional questions.  
450 Nevertheless, the geographic variation explored allowed us to better understand differentiation  
451 among British Columbia locations. To this end, a bootstrapped maximum likelihood tree was  
452 constructed using a linkage-disequilibrium thinned SNP-set using SnpPhylo [81]. As can be seen  
453 in Figure 2, the dendrogram clusters samples by regions similar to past analyses with more  
454 comprehensive sampling but using older marker technologies (see above). Samples can be  
455 resolved into regions corresponding to descriptions from the comprehensive sampling of  
456 Beacham et al. (2009) [10], with individual samples resolvable into Japan – Hokkaido; BC  
457 Central Coast (Snootli and Kitimat); BC- Haida Gwaii (Deena Creek); BC – West Coast Vancouver

458 Island (Nitinat); BC – Strait of Georgia (Tenderfoot, Big Qualicum, Puntledge); and BC – Lower  
459 Fraser (Chilliwack, Inch, Chehalis). However, within clusters from multiple regions, we see a  
460 relative lack of resolution to the riverine level. Such observations are supported by Principal  
461 Component Analysis (PCA) as well (Figure 3); however, we do begin to see stronger  
462 delineation, possibly from the increased number of variant and dimensions in the PCA analysis.  
463 In Figure 3A, we observe differentiation across the Pacific Ocean (best described along PC1),  
464 and to a lesser degree geographically across the British Columbia coastline (along PC2). When  
465 described regionally, individuals from most populations can easily be resolved when focusing  
466 on the British Columbia coastline (Figure 3B), and we are able to see delineation among all  
467 collections, except those in the Fraser River Basin. Focusing on the Fraser River Basin sites  
468 alone, the pattern is less clustered (Figure 3C), although we do see some separation from  
469 salmon collected in different river systems of the Fraser River drainage.

470 Clustering techniques show that river-level resolution is not always observed. Such  
471 results have been noted in the past when considering fishery mixture resolution and describing  
472 assignments to region only (for example [9, 93]), but it is worth emphasizing that incomplete  
473 resolution among collected populations remains true when considering a relatively  
474 comprehensive genome-wide representation of variation. As part of the thinning procedure for  
475 SNPhylo, however, by default a significant number of SNPs are removed to increase the speed  
476 of the calculation. Alternatively, in the analysis of principal components, with just an LD  
477 threshold applied (0.2), a much greater number of SNPs were input into the resulting analysis,  
478 and it is likely that the number of SNPs in the end analysis played at least a partial role in the  
479 reduced delineation observed in the dendrogram relative to the PCA. While collection level  
480 differentiation does emerge in the PCA result, observations on reduced datasets (e.g., by  
481 chromosome) greatly inhibited the resolving power of the analysis (supplementary figure 5).  
482 Based on the results presented here, it is likely that collection level-specific SNPs could be  
483 identified in this dataset that maximize the population differentiation observed genome-wide,  
484 and that would further drive differentiation observed in the PCA. However, with such a small  
485 sampling size, it is likely that any such discovery would be more a representation of sampling

486 depth, and the noise within a set would be high. However, this dataset is now available, should  
487 future researchers need to draw on a pool of potential SNPs from which to develop such assays.

488       Within BC, chum salmon regional groupings are described at the conservation unit (CU)  
489 level [94], and it is intriguing to note that there may be substructure to the results observed  
490 along those lines in the present analysis. For example, the Tenderfoot hatchery samples in the  
491 Howe Sound-Burrard Inlet CU do tend to cluster more strongly, relative to the other collection  
492 sites in the adjacent Georgia Strait CU suggesting that a greater sample size may allow recovery  
493 of further groupings. However, it is likely that straying, generally described as high in chum  
494 salmon, is playing a role in limiting genetic distinctiveness to the level of the CU (or higher)  
495 regional groupings. While sampling within the study focused primarily on large hatchery  
496 operations, it is also possible we are simply revealing a high degree of variation within each  
497 population due to a large effective population size, in which case sufficient additional sampling  
498 may coalesce around a mean per population. Still, even within the dataset here, the  
499 observation remains that individual population level resolution within a region may begin to be  
500 demonstrated with genome-wide representation.

501

## 502 **Mapping the sex-determining region**

503       Although limited metadata was collected for individuals sampled beyond geographic  
504 locations sampled, we were able to collect phenotypic sex information on hatchery brood  
505 samples. Thus, we were able to explore genome wide associations (GWAs) of phenotypic sex.  
506 As demonstrated in Figure 4A, two clear peaks were observed with the GWAS: a very strong  
507 peak on Linkage Group 15, and another, albeit somewhat weaker, association on Linkage Group  
508 3. As shown in Figure 4B, the specific region overlaps with an area of increased linkage  
509 disequilibrium on the distal end of LG15 . In Figure 4C, the genotypes for each individual is  
510 displayed for the 20 SNPs seen as most associated with sex within the GWAS analysis. LG15 has  
511 been previously identified by McKinney et al. (2020), [59] as linked to sex during a RAD-seq  
512 based study of chum salmon populations within Alaska. In this prior work, linkage of sex to a  
513 particular region of the genome was complicated by two potential factors – a lack of a  
514 chromosome-level assembly for chum salmon, and the identification of a putative inversion

515 along the chromosome that resulted in significant patterns of linkage. We utilized the sex-  
516 linked RAD loci to position the markers onto the new genome assembly and observed that  
517 while all were indeed placed along Oket\_LG15, they appeared to be more dispersed along the  
518 chromosome, and were not strongly linked to sex within our geographically distinct sample set  
519 (Supplementary Table 7). Within the present study, we observed sex linked to a very narrow  
520 region along Oket\_LG15; while some noise is observed, the peak is approximately in the 30.8  
521 Mbp to 31 Mbp region and encompasses four annotated genes: potassium/sodium  
522 hyperpolarization-activated cyclic nucleotide-gated channel 2-like; E3 ubiquitin-protein ligase  
523 RNF126-like; SURP and G-patch domain-containing protein 1-like; and serine/threonine-protein  
524 kinase STK11-like. While we do not suggest any of these are the sex-determination gene – as  
525 with other Pacific salmonids it is presumed to be sdY [95] – given that the underlying genome  
526 assembly is female, this likely represents the approximate region where sdY is inserted on the  
527 Y-chromosome, and limited recombination surrounding the region has led to sex-specific  
528 markers extending to autosomal-like sequence flanking the insertion. This region (on  
529 chromosome 3.2 based on the naming scheme in Sutherland et al., 2016 [36] and Table 3)  
530 would appear to be a unique placement thus far in sdY mapping – however, the relatively  
531 common observation of sdY on chromosome arm 3.1 (sockeye salmon, coho salmon, lake  
532 whitefish; [96] and references therein) does suggest that inter-homeologue transfer between  
533 chromosome arms arising from the most recent salmon-specific duplication could be a  
534 mechanism for this transfer.

535 The strong secondary peak observed on Linkage group 3 is slightly more confounding  
536 and intriguing, as it does not appear to be linked to a known sex-determination orthologue in  
537 salmonids [96], and because potential sex-markers appear linked to those on LG-15. While it  
538 could be linked to a misplaced contig within the assembly, comparative mapping between  
539 additional species did not suggest anything was misplaced based on conserved synteny (data  
540 not shown; performed within Symap using default parameters) – if this is the case, it is likely  
541 that a future long-read based assembly will correct such a matter. It seems most likely in this  
542 case that it represents a repetitive element or otherwise duplicated sequence that is prominent  
543 in the Y-specific region but is not present in this female genome; thus, mis-mapping appears to

544 occur elsewhere in the genome. A manual review of the region does imply a highly repetitive  
545 region, with great differentiation in depths indicative of collapsed repeats. Such mismapping  
546 based on collapsed repeats or a lack of sex-specific reference is not uncommon (e.g., as  
547 demonstrated in Chinook salmon by mapping of the Y-specific growth hormone pseudogene to  
548 the GH2 locus on a different chromosome [97]) and it may be that assembly of a male genome  
549 will reveal repeat patterns underlying this unexpected result observed here. There may be  
550 additional, more complex reasons based on the observance of multiple sdY regions seen in  
551 other species (e.g., Atlantic salmon [98]), although other explanations may be equally likely  
552 here. Observations have been made elsewhere that GH-Y, a commonly used proxy for genetic  
553 sex in salmonids [99], was found to be missing in males or present in females in some chum  
554 salmon populations [100]. While the presented genome is female-based (and thus not  
555 predicted to contain GH-Y), observation of relative coverage at the most closely related gene in  
556 the genome – GH2 – indeed implied that between 0-5 copies of GH-Y are observed in male  
557 individuals, with those males observed to be missing GH-Y being from Kitimat (2x), Snootli (1x)  
558 and Tenderfoot (1x): see supplementary table 6. These data do not suggest the phenotypes are  
559 mis-identified, however, as inclusion of a Rainbow trout sdY into the alignment phase  
560 demonstrated that the presence of sdY matches the phenotype, as would be predicted [95]. No  
561 copy-number differences could be interpreted from the sdY alignment unfortunately, as the  
562 underlying sequence from trout appeared too differentiated to obtain a reliable estimate of  
563 coverage; however, reads were observed aligned to the sequence in all male individuals and  
564 not in female individuals in a manual review utilizing IGV viewer. Still, the GH-Y results do  
565 indicate that there is variability in the genomic architecture surrounding sdY, and perhaps may  
566 indicate that alternate locations within the genome could be influential. Whatever the  
567 underlying genomic architecture of the sex-determination region may be in chum salmon, the  
568 result presented here underlines the usefulness and ease of use of the presented SNP dataset  
569 and reference genome in mapping a trait of interest to the appropriate chromosome and  
570 chromosomal region within the genome.  
571

572 **Conclusions**

573           The genome assembly for chum salmon represents a relatively complete representation  
574 of the chum salmon genome: the first such resource for the species. Contiguity and  
575 completeness is likely most affected in regions with high residual tetraploidy or incomplete re-  
576 diploidization. While long-read based assemblies (and future sequencing technologies) are  
577 likely to generate a more complete picture, the current genome assembly represents a valuable  
578 resource for chum salmon on par with those available for Chinook, sockeye, and longstanding  
579 assemblies for Atlantic salmon and rainbow trout that allowed a transformation in genomic  
580 understanding of these commercially and culturally specific species (e.g., [101]).  
581 Complementing the presented genome is a pilot-scale catalogue of variation that provides a  
582 genome-wide resource for British Columbian chum salmon populations, and allows for  
583 contrasting variation in Western and Eastern Pacific lineages. Such a dataset will be explored  
584 further as a resource for SNP genotyping panel expansion, structural variation discovery, or as  
585 demonstrated here, in identification of the chromosome and position most likely to contain the  
586 sex-determination gene in chum salmon.  
587

588 **Acknowledgements**

589           We would like to thank the staff at McGill University and Genome Quebec Innovation  
590 Centre (now the Centre d'expertise et de services Génome Québec; <https://cesgq.com/>) in  
591 Montreal, QC, Canada, and the NRC Plant Biotechnology Institute Sequencing Centre in  
592 Saskatoon, SK, Canada, for their work on library construction and sequencing on this project.  
593 Compute Canada (<https://www.computecanada.ca/>) provided much of the computing power  
594 for genome assembly and SNP discovery, primarily on the Cedar cluster. Support for this  
595 research from Fisheries and Oceans Canada, the Canadian Regulatory System for  
596 Biotechnology.  
597

598 **References**

- 599 1. Helfield JM, Naiman RJ. Keystone Interactions: Salmon and Bear in Riparian Forests of Alaska.  
600 Ecosystems. 2006;9:167–80.
- 601 2. Salo EO. Life History of Chum Salmon (*Oncorhynchus keta*). In: Groot C, Margolis L, editors.  
602 Pacific salmon life histories. Vancouver: UBC Press; 1991.
- 603 3. Bakkala RG. Synopsis of Biological Data on the Chum Salmon, *Oncorhynchus Keta* (Walbaum)  
604 1792. U.S. Fish and Wildlife Service; 1970.
- 605 4. Fredin RA, Major RL, Bakkala RG, Tanonaka GK. Pacific salmon and the high seas salmon  
606 fisheries of Japan. 1977.
- 607 5. Behnke R. Trout and salmon of north america. Free Press; 2010.
- 608 6. Gislason G, Lam E, Knapp G, Guettabi M. Economic Impacts of Pacific Salmon Fisheries.  
609 Pacific Salmon Commission. University of Alaska Anchorage Institute of Social & Economic  
610 Research.
- 611 7. Keefer ML, Caudill CC. Homing and straying by anadromous salmonids: a review of  
612 mechanisms and rates. Reviews in Fish Biology and Fisheries. 2014;24:333–68.
- 613 8. Quinn TP, Stewart IJ, Boatright CP. Experimental evidence of homing to site of incubation by  
614 mature sockeye salmon, *Oncorhynchus nerka*. Animal Behaviour. 2006;72:941–9.
- 615 9. Beacham T, Sato S, Urawa S, Le K, Wetklo M. Population structure and stock identification of  
616 chum salmon *Oncorhynchus keta* from Japan determined by microsatellite DNA variation.  
617 Fisheries Science. 2008;74:983–94.
- 618 10. Beacham TD, Candy JR, Le KD, Wetklo M. Population structure of chum salmon  
619 (*Oncorhynchus keta*) across the Pacific Rim, determined from microsatellite analysis. Fishery  
620 Bulletin. 2009;107:244–60.
- 621 11. Olsen JB, Flannery BG, Beacham TD, Bromaghin JF, Crane PA, Lean CF, et al. The influence of  
622 hydrographic structure and seasonal run timing on genetic diversity and isolation-by-distance in  
623 chum salmon (*Oncorhynchus keta*). Can J Fish Aquat Sci. 2008;65:2026–42.
- 624 12. Small MP, Frye AE, Von Bargaen JF, Young SF. Genetic Structure of Chum Salmon  
625 (*Oncorhynchus keta*) Populations in the Lower Columbia River: Are Chum Salmon in Cascade  
626 Tributaries Remnant Populations? Conservation Genetics. 2006;7:65–78.
- 627 13. Small MP, Rogers Olive SD, Seeb LW, Seeb JE, Pascal CE, Warheit KI, et al. Chum Salmon  
628 Genetic Diversity in the Northeastern Pacific Ocean Assessed with Single Nucleotide  
629 Polymorphisms (SNPs): Applications to Fishery Management. North American Journal of  
630 Fisheries Management. 2015;35:974–87.

- 631 14. Crow KD. What Is the Role of Genome Duplication in the Evolution of Complexity and  
632 Diversity? *Molecular Biology and Evolution*. 2006;23:887–92.
- 633 15. Ohno S. *Evolution by Gene Duplication*. Berlin, Heidelberg: Springer Berlin Heidelberg; 1970.
- 634 16. Otto SP, Whitton J. Polyploid Incidence and Evolution. *Annu Rev Genet*. 2000;34:401–37.
- 635 17. Taylor JS, Raes J. Duplication and Divergence: The Evolution of New Genes and Old Ideas.  
636 *Annu Rev Genet*. 2004;38:615–43.
- 637 18. Sankoff D, Zheng C. Whole Genome Duplication in Plants: Implications for Evolutionary  
638 Analysis. In: Setubal JC, Stoye J, Stadler PF, editors. *Comparative Genomics*. New York, NY:  
639 Springer New York; 2018. p. 291–315.
- 640 19. Wolfe KH, Shields DC. Molecular evidence for an ancient duplication of the entire yeast  
641 genome. *Nature*. 1997;387:708–13.
- 642 20. Kellis M, Birren BW, Lander ES. Proof and evolutionary analysis of ancient genome  
643 duplication in the yeast *Saccharomyces cerevisiae*. *Nature*. 2004;428:617–24.
- 644 21. Kenny NJ, Chan KW, Nong W, Qu Z, Maeso I, Yip HY, et al. Ancestral whole-genome  
645 duplication in the marine chelicerate horseshoe crabs. *Heredity*. 2016;116:190–9.
- 646 22. Schwager EE, Sharma PP, Clarke T, Leite DJ, Wierschin T, Pechmann M, et al. The house  
647 spider genome reveals an ancient whole-genome duplication during arachnid evolution. *BMC*  
648 *Biol*. 2017;15:62.
- 649 23. Putnam NH, Butts T, Ferrier DEK, Furlong RF, Hellsten U, Kawashima T, et al. The amphioxus  
650 genome and the evolution of the chordate karyotype. *Nature*. 2008;453:1064–71.
- 651 24. Dehal P, Boore JL. Two Rounds of Whole Genome Duplication in the Ancestral Vertebrate.  
652 *PLoS Biol*. 2005;3:e314.
- 653 25. Taylor JS, Van de Peer Y, Braasch I, Meyer A. Comparative genomics provides evidence for  
654 an ancient genome duplication event in fish. *Phil Trans R Soc Lond B*. 2001;356:1661–79.
- 655 26. Taylor JS. Genome Duplication, a Trait Shared by 22,000 Species of Ray-Finned Fish.  
656 *Genome Research*. 2003;13:382–90.
- 657 27. Hoegg S, Brinkmann H, Taylor JS, Meyer A. Phylogenetic Timing of the Fish-Specific Genome  
658 Duplication Correlates with the Diversification of Teleost Fish. *J Mol Evol*. 2004;59:190–203.
- 659 28. Allendorf FW, Thorgaard GH. Tetraploidy and the Evolution of Salmonid Fishes. In: Turner  
660 BJ, editor. *Evolutionary Genetics of Fishes*. Boston, MA: Springer US; 1984. p. 1–53.



- 661 29. Macqueen DJ, Johnston IA. A well-constrained estimate for the timing of the salmonid  
662 whole genome duplication reveals major decoupling from species diversification. *Proc R Soc B*.  
663 2014;281:20132881.
- 664 30. Van de Peer Y, Mizrachi E, Marchal K. The evolutionary significance of polyploidy. *Nature*  
665 *Reviews Genetics*. 2017;18:411–24.
- 666 31. Jones SR, Fast MD, Johnson SC, Groman DB. Differential rejection of salmon lice by pink and  
667 chum salmon: disease consequences and expression of proinflammatory genes. *Dis Aquat*  
668 *Organ*. 2007;75:229–38.
- 669 32. Sutherland BJ, Koczka KW, Yasuike M, Jantzen SG, Yazawa R, Koop BF, et al. Comparative  
670 transcriptomics of Atlantic *Salmo salar*, chum *Oncorhynchus keta* and pink salmon *O. gorbuscha*  
671 during infections with salmon lice *Lepeophtheirus salmonis*. *BMC Genomics*. 2014;15:200.
- 672 33. Allendorf FW, Bassham S, Cresko WA, Limborg MT, Seeb LW, Seeb JE. Effects of Crossovers  
673 Between Homeologs on Inheritance and Population Genomics in Polyploid-Derived Salmonid  
674 Fishes. *Journal of Heredity*. 2015;106:217–27.
- 675 34. Waples RK, Seeb LW, Seeb JE. Linkage mapping with paralogs exposes regions of residual  
676 tetrasomic inheritance in chum salmon (*Oncorhynchus keta*). *Mol Ecol Resour*. 2016;16:17–28.
- 677 35. Robertson FM, Gundappa MK, Grammes F, Hvidsten TR, Redmond AK, Lien S, et al. Lineage-  
678 specific rediploidization is a mechanism to explain time-lags between genome duplication and  
679 evolutionary diversification. *Genome Biology*. 2017;18:111.
- 680 36. Sutherland BJJ, Gosselin T, Normandeau E, Lamothe M, Isabel N, Audet C, et al. Salmonid  
681 Chromosome Evolution as Revealed by a Novel Method for Comparing RADseq Linkage Maps.  
682 *Genome Biology and Evolution*. 2016;8:3600–17.
- 683 37. Berthelot C, Brunet F, Chalopin D, Juanchich A, Bernard M, Noël B, et al. The rainbow trout  
684 genome provides novel insights into evolution after whole-genome duplication in vertebrates.  
685 *Nat Commun*. 2014;5:3657.
- 686 38. Lien S, Koop BF, Sandve SR, Miller JR, Kent MP, Nome T, et al. The Atlantic salmon genome  
687 provides insights into rediploidization. *Nature*. 2016;533:200–5.
- 688 39. Pearse DE, Barson NJ, Nome T, Gao G, Campbell MA, Abadía-Cardoso A, et al. Sex-  
689 dependent dominance maintains migration supergene in rainbow trout. *Nat Ecol Evol*.  
690 2019;3:1731–42.
- 691 40. Christensen KA, Leong JS, Sakhrani D, Biagi CA, Minkley DR, Withler RE, et al. Chinook  
692 salmon (*Oncorhynchus tshawytscha*) genome and transcriptome. *PLoS ONE*. 2018;13:e0195461.

- 693 41. Narum SR, Di Genova A, Micheletti SJ, Maass A. Genomic variation underlying complex life-  
694 history traits revealed by genome sequencing in Chinook salmon. *Proc R Soc B*.  
695 2018;285:20180935.
- 696 42. Sävilammi T, Primmer CR, Varadharajan S, Guyomard R, Guiguen Y, Sandve SR, et al. The  
697 Chromosome-Level Genome Assembly of European Grayling Reveals Aspects of a Unique  
698 Genome Evolution Process Within Salmonids. *G3*. 2019;9:1283–94.
- 699 43. Varadharajan S, Sandve SR, Gillard GB, Tørresen OK, Mulugeta TD, Hvidsten TR, et al. The  
700 Grayling Genome Reveals Selection on Gene Expression Regulation after Whole-Genome  
701 Duplication. *Genome Biology and Evolution*. 2018;10:2785–800.
- 702 44. De-Kayne R, Zoller S, Feulner PGD. A *de novo* chromosome-level genome assembly of  
703 *Coregonus sp. "Balchen"* : one representative of the Swiss Alpine whitefish radiation. preprint.  
704 *Genomics*; 2019.
- 705 45. Beacham TD, Wallace CG, Jonsen K, Sutherland BJG, Gummer C, Rondeau EB. Estimation of  
706 Conservation Unit and population contribution to Chinook salmon mixed-stock fisheries in  
707 British Columbia, Canada using direct DNA sequencing for single nucleotide polymorphisms.  
708 *Can J Fish Aquat Sci*. 2021. <https://doi.org/10.1139/cjfas-2020-0462>.
- 709 46. Beacham TD, Wallace C, Jonsen K, McIntosh B, Candy JR, Rondeau EB, et al. Accurate  
710 estimation of conservation unit contribution to coho salmon mixed-stock fisheries in British  
711 Columbia, Canada, using direct DNA sequencing for single nucleotide polymorphisms. *Can J Fish*  
712 *Aquat Sci*. 2020;77:1302–15.
- 713 47. Phelps SR, LeClair LL, Young S, Blankenship HL. Genetic Diversity Patterns of Chum Salmon in  
714 the Pacific Northwest. *Can J Fish Aquat Sci*. 1994;51:65–83.
- 715 48. Seeb LW, Crane PA. High Genetic Heterogeneity in Chum Salmon in Western Alaska, the  
716 Contact Zone between Northern and Southern Lineages. *Transactions of the American Fisheries*  
717 *Society*. 1999;128:58–87.
- 718 49. Beacham TD, Spilsted B, Le KD, Wetklo M. Population structure and stock identification of  
719 chum salmon (*Oncorhynchus keta*) from British Columbia determined with microsatellite DNA  
720 variation. *Can J Zool*. 2008;86:1002–14.
- 721 50. Smith CT, Seeb LW. Number of Alleles as a Predictor of the Relative Assignment Accuracy of  
722 Short Tandem Repeat (STR) and Single-Nucleotide-Polymorphism (SNP) Baselines for Chum  
723 Salmon. *Transactions of the American Fisheries Society*. 2008;137:751–62.
- 724 51. Smith CT, Baker J, Park L, Seeb LW, Elfstrom C, Abe S, et al. Characterization of 13 single  
725 nucleotide polymorphism markers for chum salmon: PRIMER NOTE. *Molecular Ecology Notes*.  
726 2005;5:259–62.

- 727 52. Smith CT, Elfstrom CM, Seeb LW, Seeb JE. Use of sequence data from rainbow trout and  
728 Atlantic salmon for SNP detection in Pacific salmon: SNPs IN PACIFIC SALMON. *Molecular*  
729 *Ecology*. 2005;14:4193–203.
- 730 53. Elfstrom CM, Smith CT, Seeb LW. Thirty-eight single nucleotide polymorphism markers for  
731 high-throughput genotyping of chum salmon. *Mol Ecol Notes*. 2007;7:1211–5.
- 732 54. Seeb JE, Pascal CE, Grau ED, Seeb LW, Templin WD, Harkins T, et al. Transcriptome  
733 sequencing and high-resolution melt analysis advance single nucleotide polymorphism  
734 discovery in duplicated salmonids: PERMANENT GENETIC RESOURCES ARTICLE. *Molecular*  
735 *Ecology Resources*. 2011;11:335–48.
- 736 55. Petrou EL, Hauser L, Waples RS, Seeb JE, Templin WD, Gomez-Uchida D, et al. Secondary  
737 contact and changes in coastal habitat availability influence the nonequilibrium population  
738 structure of a salmonid (*Oncorhynchus keta*). *Mol Ecol*. 2013;22:5848–60.
- 739 56. Small M, Warheit K, Pascal C, Seeb L, Ruff C, Zischke J, et al. Chum Salmon Southern Area  
740 Genetic Baseline Enhancement Part 1 and Part 2: Amplicon Development, Expanded Baseline  
741 Collections, and Genotyping.
- 742 57. Baird NA, Etter PD, Atwood TS, Currey MC, Shiver AL, Lewis ZA, et al. Rapid SNP Discovery  
743 and Genetic Mapping Using Sequenced RAD Markers. *PLoS ONE*. 2008;3:e3376.
- 744 58. Miller MR, Dunham JP, Amores A, Cresko WA, Johnson EA. Rapid and cost-effective  
745 polymorphism identification and genotyping using restriction site associated DNA (RAD)  
746 markers. *Genome Research*. 2007;17:240–8.
- 747 59. McKinney G, McPhee MV, Pascal C, Seeb JE, Seeb LW. Network Analysis of Linkage  
748 Disequilibrium Reveals Genome Architecture in Chum Salmon. *G3: Genes | Genomes | Genetics*.  
749 2020;10:1553.
- 750 60. Gao G, Nome T, Pearse DE, Moen T, Naish KA, Thorgaard GH, et al. A New Single Nucleotide  
751 Polymorphism Database for Rainbow Trout Generated Through Whole Genome Resequencing.  
752 *Front Genet*. 2018;9:147.
- 753 61. Christensen KA, Rondeau EB, Minkley DR, Sakhrani D, Biagi CA, Flores A-M, et al. The  
754 sockeye salmon genome, transcriptome, and analyses identifying population defining regions of  
755 the genome. *PLOS ONE*. 2020;15:e0240935.
- 756 62. Quillet E, Garcia P, Guyomard R. Analysis of the production of all homozygous lines of  
757 rainbow trout by gynogenesis. *J Exp Zool*. 1991;257:367–74.
- 758 63. Genomic DNA Preparation from RNAlater™ Preserved Tissues—CA [Internet].  
759 [https://www.thermofisher.com/ca/en/home/references/protocols/nucleic-acid-purification-](https://www.thermofisher.com/ca/en/home/references/protocols/nucleic-acid-purification-and-analysis/rna-protocol/genomic-dna-preparation-from-rnalater-preserved-tissues.html)  
760 [and-analysis/rna-protocol/genomic-dna-preparation-from-rnalater-preserved-tissues.html](https://www.thermofisher.com/ca/en/home/references/protocols/nucleic-acid-purification-and-analysis/rna-protocol/genomic-dna-preparation-from-rnalater-preserved-tissues.html).  
761 Accessed 18 Feb 2021.

- 762 64. Christensen KA, Rondeau EB, Minkley DR, Leong JS, Nugent CM, Danzmann RG, et al. The  
763 Arctic charr (*Salvelinus alpinus*) genome and transcriptome assembly. PLoS ONE.  
764 2018;13:e0204076.
- 765 65. Rondeau EB, Minkley DR, Leong JS, Messmer AM, Jantzen JR, von Schalburg KR, et al. The  
766 Genome and Linkage Map of the Northern Pike (*Esox lucius*): Conserved Synteny Revealed  
767 between the Salmonid Sister Group and the Neoteleostei. PLoS ONE. 2014;9:e102089.
- 768 66. Bolger AM, Lohse M, Usadel B. Trimmomatic: a flexible trimmer for Illumina sequence data.  
769 Bioinformatics. 2014;30:2114–20.
- 770 67. Marić J. Long Read RNA-seq Mapper. Master Thesis. University of Zagreb; 2015.
- 771 68. Gnerre S, MacCallum I, Przybylski D, Ribeiro FJ, Burton JN, Walker BJ, et al. High-quality  
772 draft assemblies of mammalian genomes from massively parallel sequence data. Proceedings of  
773 the National Academy of Sciences. 2011;108:1513–8.
- 774 69. English AC, Richards S, Han Y, Wang M, Vee V, Qu J, et al. Mind the Gap: Upgrading  
775 Genomes with Pacific Biosciences RS Long-Read Sequencing Technology. PLoS ONE.  
776 2012;7:e47768.
- 777 70. Walker BJ, Abeel T, Shea T, Priest M, Abouelliel A, Sakthikumar S, et al. Pilon: An Integrated  
778 Tool for Comprehensive Microbial Variant Detection and Genome Assembly Improvement.  
779 PLOS ONE. 2014;9:e112963.
- 780 71. Johnson HA, Rondeau EB, Minkley DR, Leong JS, Whitehead J, Despina CA, et al. Population  
781 genomics of North American northern pike: variation and sex-specific signals from a  
782 chromosome-level, long read genome assembly. bioRxiv. 2020;:2020.06.18.157701.
- 783 72. Soderlund C, Bomhoff M, Nelson WM. SyMAP v3.4: a turnkey synteny system with  
784 application to plant genomes. Nucleic Acids Research. 2011;39:e68–e68.
- 785 73. Seppy M, Manni M, Zdobnov EM. BUSCO: Assessing Genome Assembly and Annotation  
786 Completeness. In: Kollmar M, editor. Gene Prediction: Methods and Protocols. New York, NY:  
787 Springer New York; 2019. p. 227–45.
- 788 74. Poplin R, Ruano-Rubio V, DePristo MA, Fennell TJ, Carneiro MO, Van der Auwera GA, et al.  
789 Scaling accurate genetic variant discovery to tens of thousands of samples. bioRxiv.  
790 2018;:201178.
- 791 75. DePristo MA, Banks E, Poplin R, Garimella KV, Maguire JR, Hartl C, et al. A framework for  
792 variation discovery and genotyping using next-generation DNA sequencing data. Nat Genet.  
793 2011;43:491–8.

- 794 76. Van der Auwera GA, Carneiro MO, Hartl C, Poplin R, del Angel G, Levy-Moonshine A, et al.  
795 From FastQ Data to High-Confidence Variant Calls: The Genome Analysis Toolkit Best Practices  
796 Pipeline. *Current Protocols in Bioinformatics*. 2013;43:11.10.1-11.10.33.
- 797 77. Li H. Aligning sequence reads, clone sequences and assembly contigs with BWA-MEM. 2013.
- 798 78. Li H, Handsaker B, Wysoker A, Fennell T, Ruan J, Homer N, et al. The Sequence  
799 Alignment/Map format and SAMtools. *Bioinformatics*. 2009;25:2078–9.
- 800 79. Picard toolkit. Broad Institute; 2019.
- 801 80. Danecek P, Auton A, Abecasis G, Albers CA, Banks E, DePristo MA, et al. The variant call  
802 format and VCFtools. *Bioinformatics*. 2011;27:2156–8.
- 803 81. Lee T-H, Guo H, Wang X, Kim C, Paterson AH. SNPhylo: a pipeline to construct a  
804 phylogenetic tree from huge SNP data. *BMC Genomics*. 2014;15:162.
- 805 82. Wickham H. *ggplot2: Elegant Graphics for Data Analysis*. Springer-Verlag New York; 2016.
- 806 83. Chang CC, Chow CC, Tellier LC, Vattikuti S, Purcell SM, Lee JJ. Second-generation PLINK:  
807 rising to the challenge of larger and richer datasets. *GigaScience*. 2015;4.
- 808 84. R Core Team. *R: A Language and Environment for Statistical Computing*. Vienna, Austria: R  
809 Foundation for Statistical Computing; 2020.
- 810 85. Turner SD. qqman: an R package for visualizing GWAS results using Q-Q and manhattan  
811 plots. *Journal of Open Source Software*. 2018;3:731.
- 812 86. Jombart T. adegenet: a R package for the multivariate analysis of genetic markers.  
813 *Bioinformatics*. 2008;24:1403–5.
- 814 87. Robinson JT, Thorvaldsdóttir H, Winckler W, Guttman M, Lander ES, Getz G, et al.  
815 Integrative genomics viewer. *Nature Biotechnology*. 2011;29:24–6.
- 816 88. Krzywinski M, Schein J, Birol I, Connors J, Gascoyne R, Horsman D, et al. Circos: An  
817 information aesthetic for comparative genomics. *Genome Research*. 2009;19:1639–45.
- 818 89. Gao G, Magadan S, Waldbieser GC, Youngblood RC, Wheeler PA, Scheffler BE, et al. A long  
819 reads-based de-novo assembly of the genome of the Arlee homozygous line reveals  
820 chromosomal rearrangements in rainbow trout. *G3 Genes|Genomes|Genetics*. 2021.  
821 <https://doi.org/10.1093/g3journal/jkab052>.
- 822 90. Palstra AP, Fukaya K, Chiba H, Dirks RP, Planas JV, Ueda H. The Olfactory Transcriptome and  
823 Progression of Sexual Maturation in Homing Chum Salmon *Oncorhynchus keta*. *PLOS ONE*.  
824 2015;10:e0137404.

- 825 91. Tataru Y, Kakizaki I, Kuroda Y, Suto S, Ishioka H, Endo M. Epiphycan from salmon nasal  
826 cartilage is a novel type of large leucine-rich proteoglycan. *Glycobiology*. 2013;23:993–1003.
- 827 92. Kurtz S, Phillippy A, Delcher AL, Smoot M, Shumway M, Antonescu C, et al. Versatile and  
828 open software for comparing large genomes. *Genome Biology*. 2004;5:R12.
- 829 93. SEEB LW, TEMPLIN WD, SATO S, ABE S, WARHEIT K, PARK JY, et al. Single nucleotide  
830 polymorphisms across a species' range: implications for conservation studies of Pacific salmon.  
831 *Molecular Ecology Resources*. 2011;11:195–217.
- 832 94. Fishery & Assessment Data Section, Pacific Biological Station. Chum Salmon (*Oncorhynchus*  
833 *keta*) Conservation Units, Sites & Status. 2017.
- 834 95. Yano A, Nicol B, Jouanno E, Quillet E, Fostier A, Guyomard R, et al. The sexually dimorphic  
835 on the Y-chromosome gene (sdY) is a conserved male-specific Y-chromosome sequence in many  
836 salmonids. *Evol Appl*. 2013;6:486–96.
- 837 96. Sutherland BJB, Rico C, Audet C, Bernatchez L. Sex Chromosome Evolution, Heterochiasmy,  
838 and Physiological QTL in the Salmonid Brook Charr *Salvelinus fontinalis*. *G3 (Bethesda)*.  
839 2017;7:2749–62.
- 840 97. Micheletti SJ, Narum SR. Utility of pooled sequencing for association mapping in nonmodel  
841 organisms. *Molecular Ecology Resources*. 2018;18:825–37.
- 842 98. Eisbrenner WD, Botwright N, Cook M, Davidson EA, Dominik S, Elliott NG, et al. Evidence for  
843 multiple sex-determining loci in Tasmanian Atlantic salmon (*Salmo salar*). *Heredity*.  
844 2014;113:86–92.
- 845 99. Devlin RH, Biagi CA, Smailus DE. Genetic mapping of Y-chromosomal DNA markers in Pacific  
846 salmon. *Genetica*. 2001;111:43–58.
- 847 100. Muttray AF, Sakhrani D, Smith JL, Nakayama I, Davidson WS, Park L, et al. Deletion and  
848 Copy Number Variation of Y-Chromosomal Regions in Coho Salmon, Chum Salmon, and Pink  
849 Salmon Populations. *Transactions of the American Fisheries Society*. 2017;146:240–51.
- 850 101. Bobe J, Marandel L, Panserat S, Boudinot P, Berthelot C, Quillet E, et al. 2 - The rainbow  
851 trout genome, an important landmark for aquaculture and genome evolution. In: MacKenzie S,  
852 Jentoft S, editors. *Genomics in Aquaculture*. San Diego: Academic Press; 2016. p. 21–43.

853

## 854 **Tables**

855

856 Table 1: Assembly results for Allpaths and PBSuite based assemblies performed.

857

858 Table 2: Summary of Annotation Release 100 from the NCBI Eukaryotic Annotation pipeline.

859 See [https://www.ncbi.nlm.nih.gov/genome/annotation\\_euk/Oncorhynchus\\_keta/100/](https://www.ncbi.nlm.nih.gov/genome/annotation_euk/Oncorhynchus_keta/100/) for

860 more details.

861

862 Table 3: Pike-like chromosome naming for the chum salmon pseudomolecules described in this

863 work, based on Sutherland et al. (2016) [36]

864

## 865 **Figures**

866

867 Figure 1: Circos plot of the chum salmon genome GCF\_012931545.1. Inner ribbons demonstrate

868 ohnologous regions (regions duplicated at the salmon-specific genome duplication event).

869 Working in to out, Track A describes the average percent identity between the duplicated

870 regions, in 1 Mbp bins. Track B describes the average percent identity in the chromosomes, in 1

871 Mbp bins. Track C describes the relationship to “Map 1” chum linkage map from Waples et al.

872 (2016) [34]. Track D describes SNPs demonstrating elevated LD ( $R^2 \geq 0.5$ ) and  $\geq 100$

873 kb apart, demonstrated as a  $\log_{10}$  based count, in 1Mbp bins.

874

875 Figure 2: Dendrogram produced by SNPhylo, utilizing set 4 SNP data described in the text.

876 Values at nodes indicate bootstrapping. Samples are coloured by geographic region.

877

878 Figure 3: Principal component analyses performed on set 3 SNPs described in the text, using

879 SNPrelate and plotted in ggplot2. Samples are coloured by collection and displayed in the  
880 legend. A) the full dataset (all samples) are presented. B), Japanese samples are removed from  
881 the analysis. C), the collections are reduced solely to the collections within the Fraser River  
882 drainage.

883

884 Figure 4: Association of the phenotypic sex to the genome utilizing SNP variant set 1. A) the  
885 results of the GWAS are presented, with Bonferroni-adjusted p-values shown at the 5% level  
886 (blue line) and 1% (orange line) levels. B) The SNPs with R-squared greater than 0.5 are  
887 counted, and plotted to show relationship of distance between SNPs being measured, for the  
888 region flanking the signal on Oket\_LG15. C) The genotypes for each individual is displayed for  
889 the 20 SNPs seen as most associated within the GWAS analysis, with homozygous reference in  
890 blue, heterozygous in purple, homozygous alternate in red, and missing genotypes in white.  
891 Samples are sorted to group males, females and unknowns (Japanese samples—most likely  
892 females).

893

#### 894 **Supplementary Data**

895

896 Supplementary Table 1: Biosample and SRA data for individual chum used in generating the  
897 genome assembly.

898

899 Supplementary Table 2: Biosample and SRA data for individual chum used in generating the  
900 Illumina RNA-seq data.

901



902 Supplementary Table 3: Biosample and SRA data for individual chum used in generating the Re-  
903 sequencing data.

904

905 Supplementary Table 4: Allpaths-LG parameters explored in attempting to obtain the highest  
906 contiguity assemblies.

907

908 Supplementary Table 5: Heterozygosity metrics by individual are described. Includes counts of  
909 missing genotypes, Homozygous Reference and Alternate genotypes, Heterozygous genotypes,  
910 average depth at called sites, the mean count of heterozygous SNPs per kbp, the ratio of  
911 Heterozygous genotypes to Homozygous alternate, and the total length of runs-of  
912 homozygosity as determined from PLINK using default parameters.

913

914 Supplementary Table 6: Depth of coverage across the alignments, and at the GH2 locus to  
915 approximate the count of GH-Y copies in each individual. GH2 is used for this calculation due to  
916 the lack of GH-Y in the reference genome, and therefore the alignment of GH-Y to the closest  
917 homologue.

918

919 Supplementary Table 7: Placement of SNPs associated with phenotypic sex from McKinney et  
920 al. [59] in Alaskan chum populations onto the current reference genome.

921

922 Supplementary Figure 1: Plotting the association between Linkage groups in Waples et al.  
923 (2016), [34] map 1, and the reference genome assembly presented in this work.

924

925 Supplementary Figure 2: Plotting the association between Linkage groups in Waples et al.  
926 (2016), [34] map 2, and the reference genome assembly presented in this work.

927

928 Supplementary Figure 3: Plotting the linkage disequilibrium along each chromosome. SNPs are  
929 only displayed if R-squared is greater than 0.5, and is plotted as a count of SNPs.

930

931 Supplementary Figure 4: Plotting the linkage disequilibrium along each chromosome. SNPs are  
932 only displayed if R-squared is greater than 0.5, and each SNP is plotted by R-squared value.

933

934 Supplementary Figure 5: Principal component analyses performed on set 3 SNPs described in  
935 the text, using SNPrelate and plotted in ggplot2 and reduced to only query LG15. Samples are  
936 coloured by collection, displayed in the legend. In panel A, the full dataset (all samples) are  
937 presented. In panel B, Japanese samples are removed from the analysis. In panel C, the samples  
938 are coloured by collection site rather than by region.

|                 | <b>Assembly size (Contigs)</b> | <b>Assembly size (Scaffolds)</b> | <b>Scaffold N50</b> | <b>Contig N50</b> |
|-----------------|--------------------------------|----------------------------------|---------------------|-------------------|
| <b>Allpaths</b> | 1471097779                     | 1813373414                       | 653                 | 13.1              |
| <b>PBSuite</b>  | 1,766,907,823                  | 1,852,809,593                    | 665,581             | 52,191            |

| <b>Feature</b>                               | <b>Annotation Release 100</b> |
|----------------------------------------------|-------------------------------|
| Genes and pseudogenes                        | 45643                         |
| protein-coding                               | 36325                         |
| non-coding                                   | 6205                          |
| transcribed pseudogenes                      | 222                           |
| non-transcribed pseudogenes                  | 2821                          |
| genes with variants                          | 14102                         |
| immunoglobulin/T-cell receptor gene segments | 70                            |

| <b>Linkage Group</b> | <b>Accession</b> | <b>Alternate Naming</b> |
|----------------------|------------------|-------------------------|
| Oket_LG01            | NC_050106        | 1.2-8.2                 |
| Oket_LG02            | NC_050107        | 6.1-2.2                 |
| Oket_LG03            | NC_050108        | 5.1                     |
| Oket_LG04            | NC_050109        | 21.1-4.2                |
| Oket_LG05            | NC_050110        | 11.2                    |
| Oket_LG06            | NC_050111        | 14.2                    |
| Oket_LG07            | NC_050112        | 16.1                    |
| Oket_LG08            | NC_050113        | 18.2                    |
| Oket_LG09            | NC_050114        | 14.1                    |
| Oket_LG10            | NC_050115        | 17.1-9.2                |
| Oket_LG11            | NC_050116        | 7.2                     |
| Oket_LG12            | NC_050117        | 7.1                     |
| Oket_LG13            | NC_050118        | 24.1-23.1               |
| Oket_LG14            | NC_050119        | 13.1-2.1                |
| Oket_LG15            | NC_050120        | 3.2                     |
| Oket_LG16            | NC_050121        | 25.1                    |
| Oket_LG17            | NC_050122        | 19.1                    |
| Oket_LG18            | NC_050123        | 1.1                     |
| Oket_LG19            | NC_050124        | 10.2-18.1               |
| Oket_LG20            | NC_050125        | 10.1                    |
| Oket_LG21            | NC_050126        | 17.2                    |
| Oket_LG22            | NC_050127        | 19.2                    |
| Oket_LG23            | NC_050128        | 3.1                     |
| Oket_LG24            | NC_050129        | 5.2                     |
| Oket_LG25            | NC_050130        | 13.2                    |
| Oket_LG26            | NC_050131        | 8.1                     |
| Oket_LG27            | NC_050132        | 12.1                    |
| Oket_LG28            | NC_050133        | 12.2-21.2               |
| Oket_LG29            | NC_050134        | 15.2-25.2               |
| Oket_LG30            | NC_050135        | 4.1-22.2                |
| Oket_LG31            | NC_050136        | 20.1                    |
| Oket_LG32            | NC_050137        | 9.1-11.1                |
| Oket_LG33            | NC_050138        | 23.2                    |
| Oket_LG34            | NC_050139        | 16.2-20.2               |
| Oket_LG35            | NC_050140        | 15.1-24.2               |
| Oket_LG36            | NC_050141        | 6.2                     |
| Oket_LG37            | NC_050142        | 22.1                    |



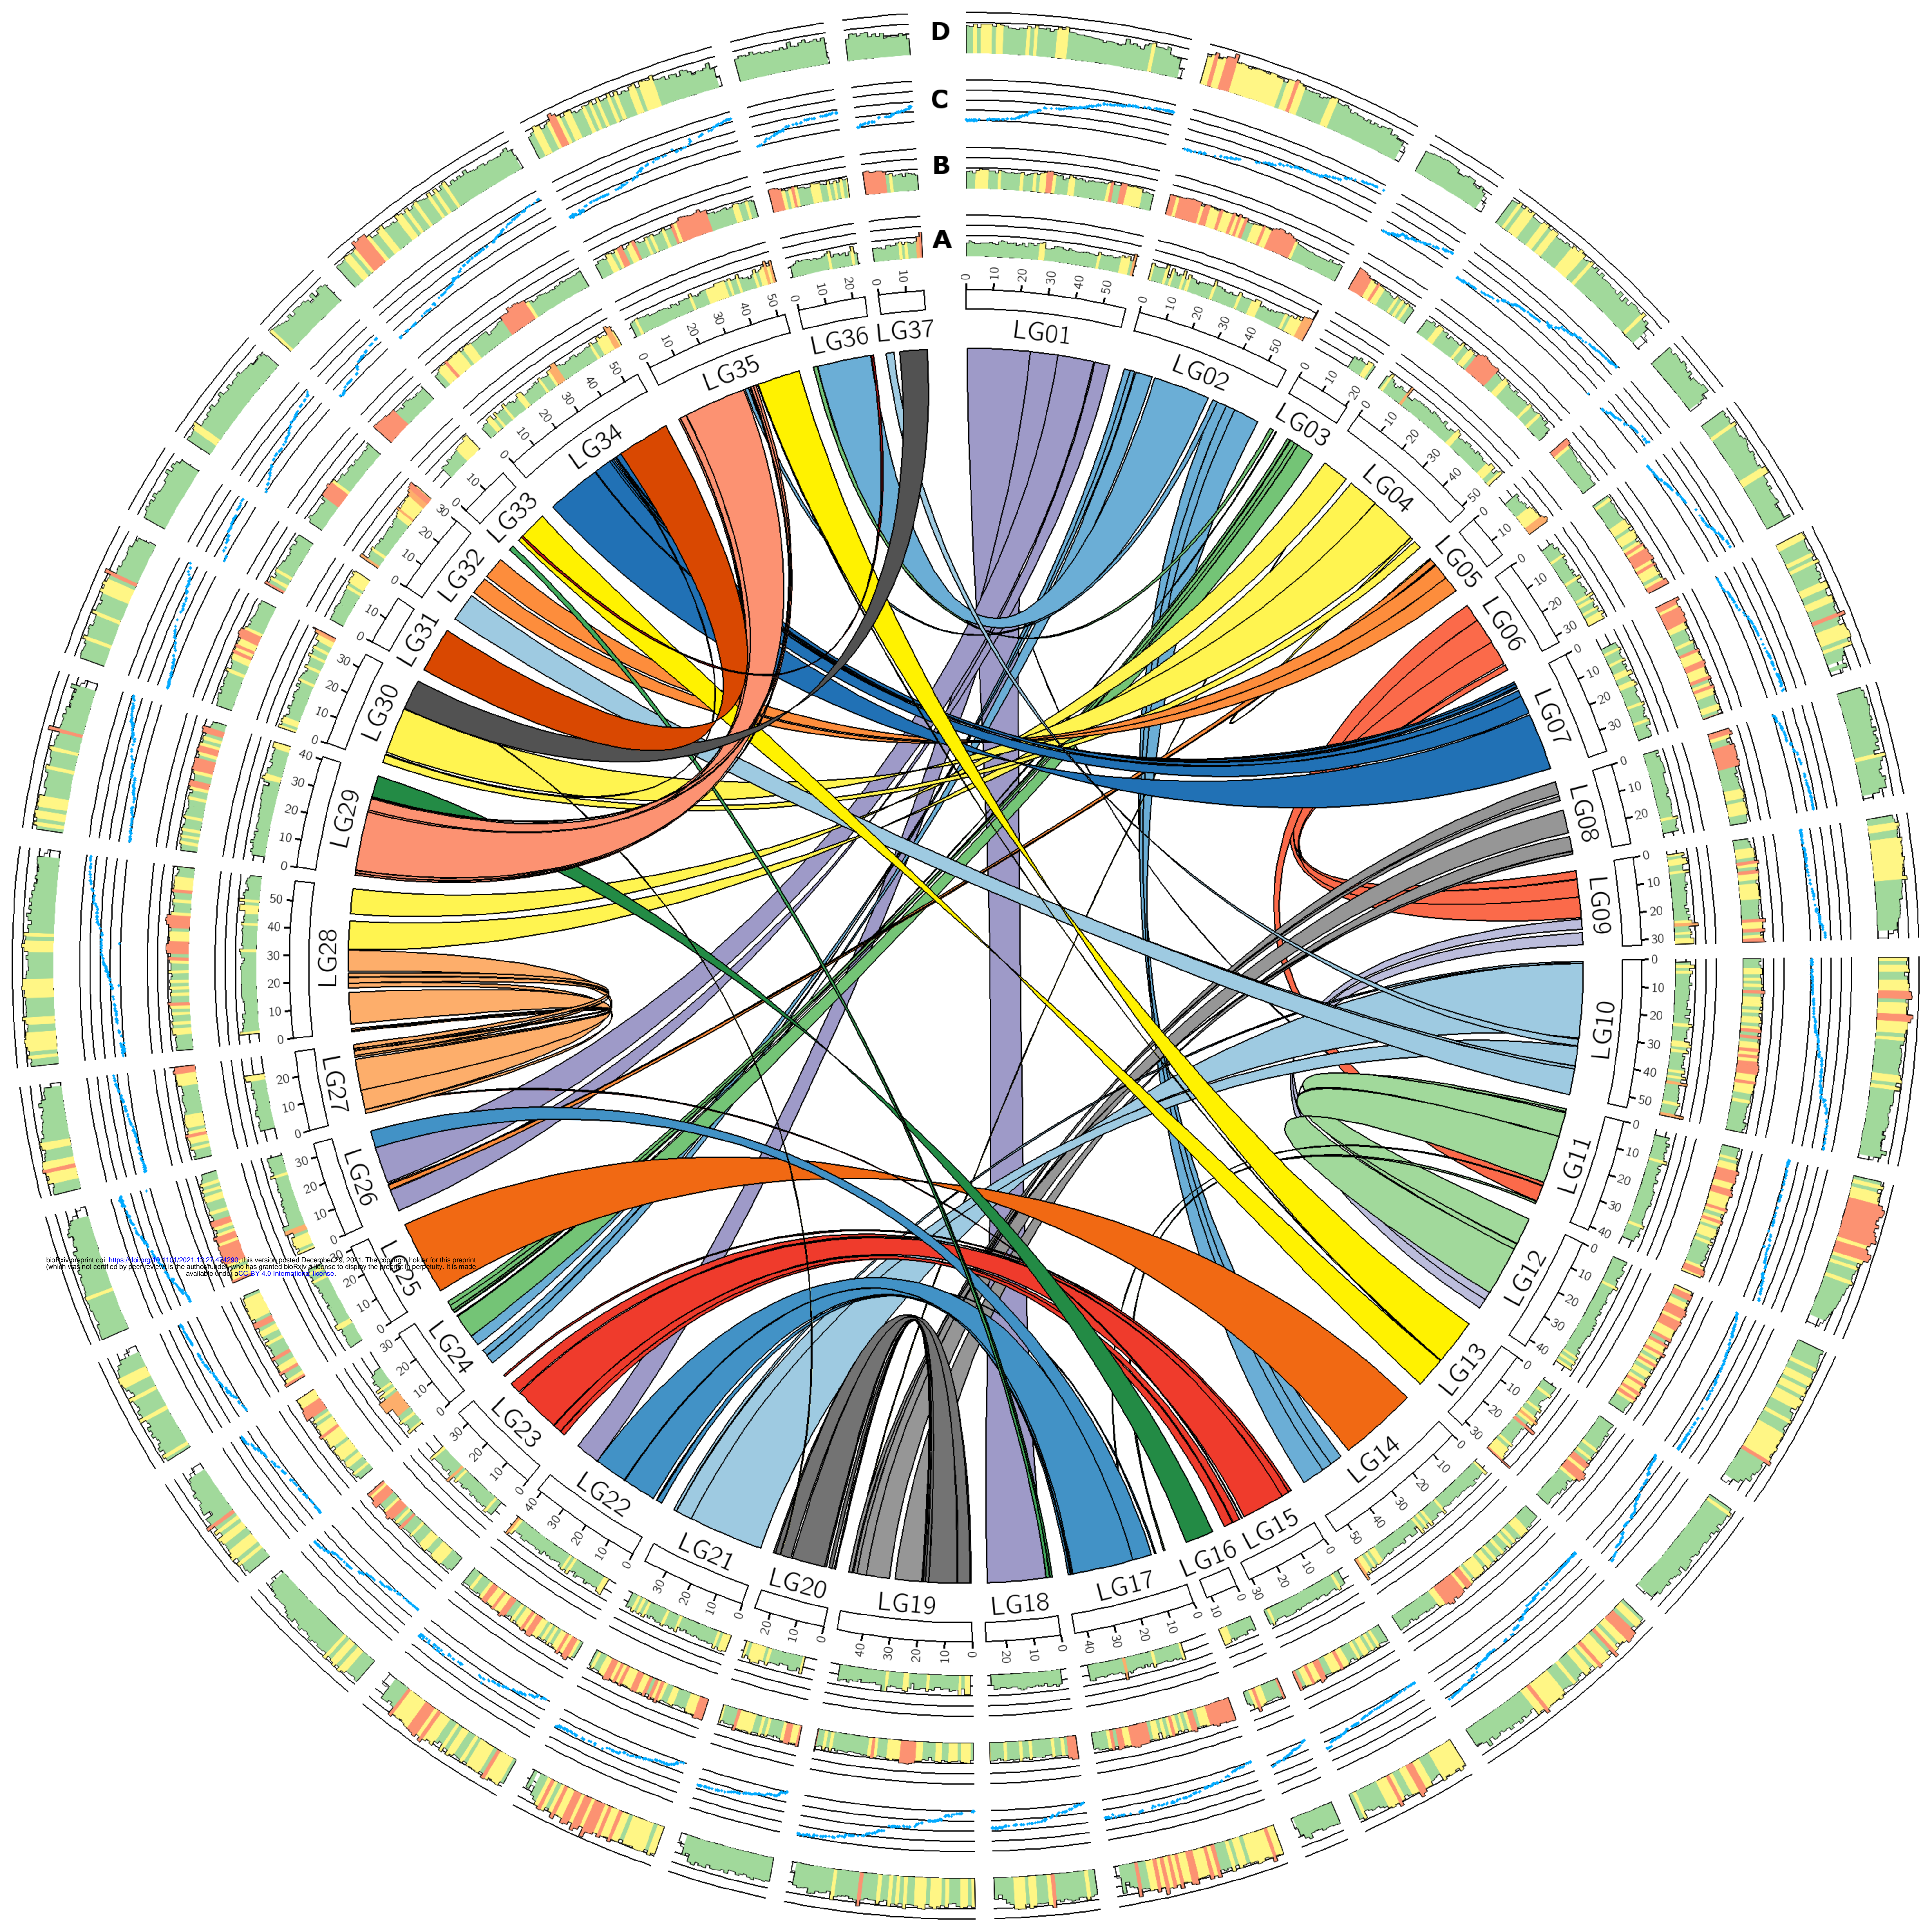



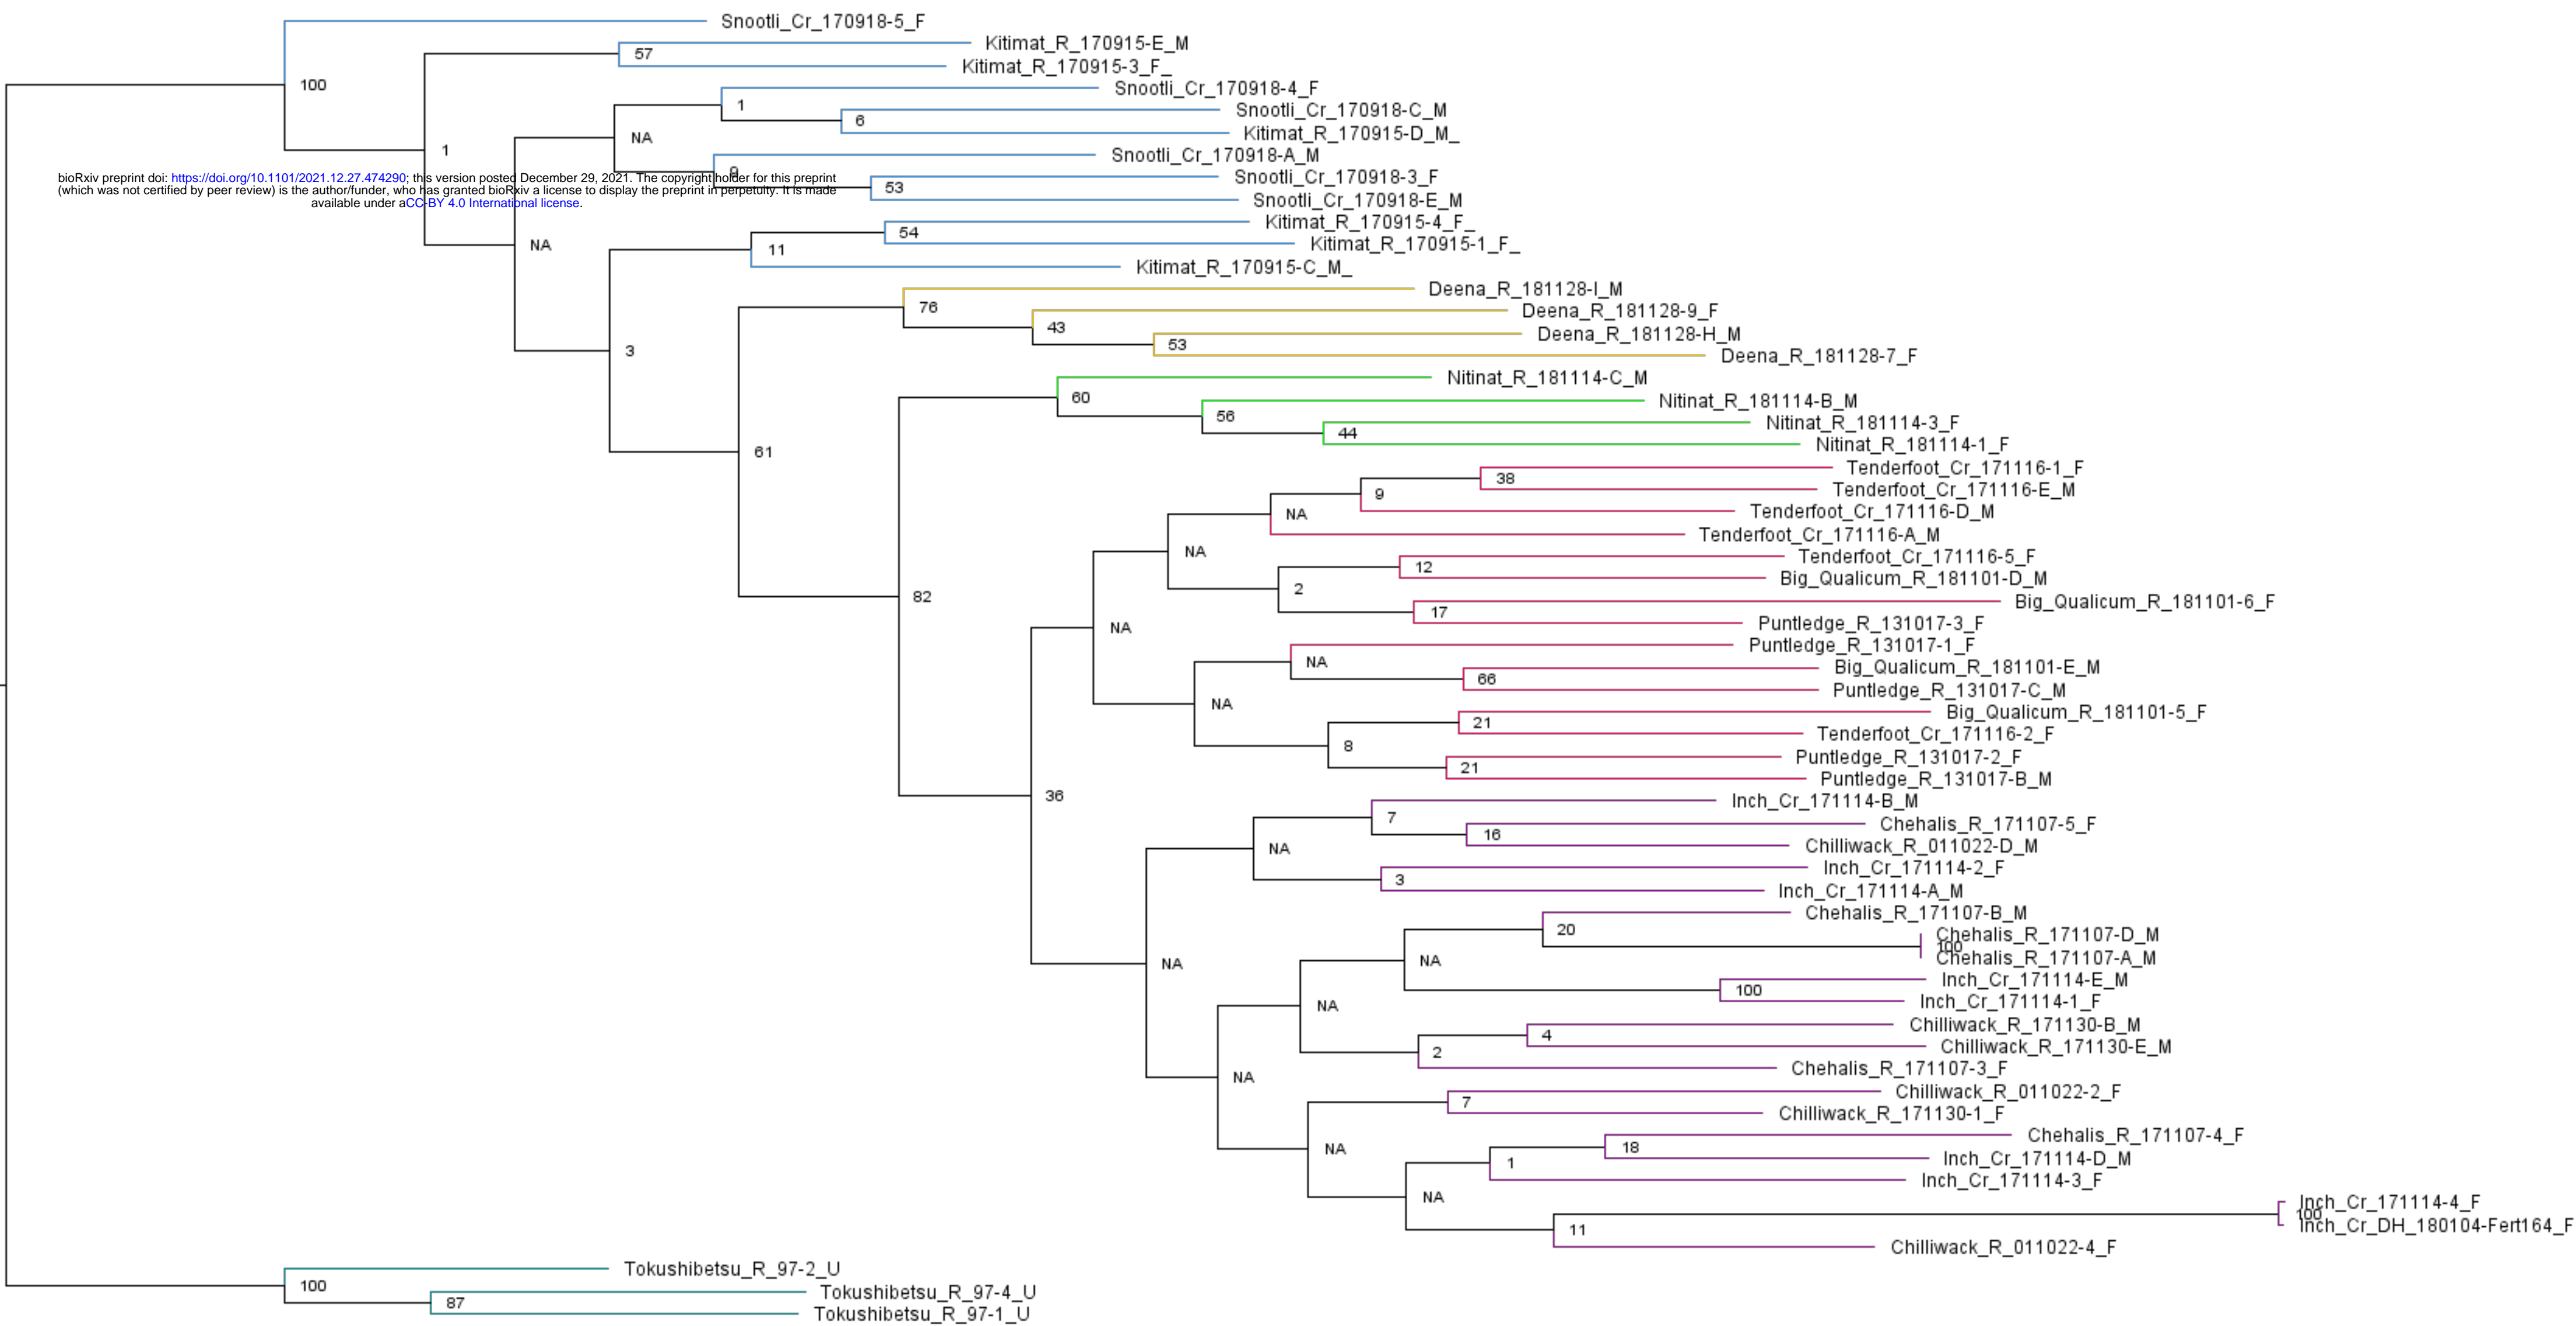

A)

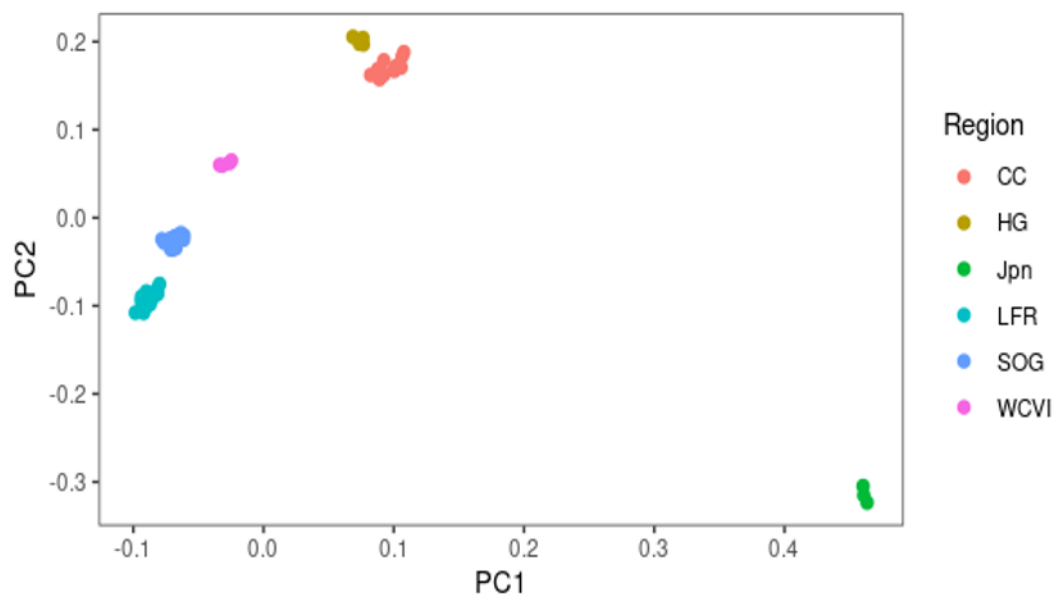

B)

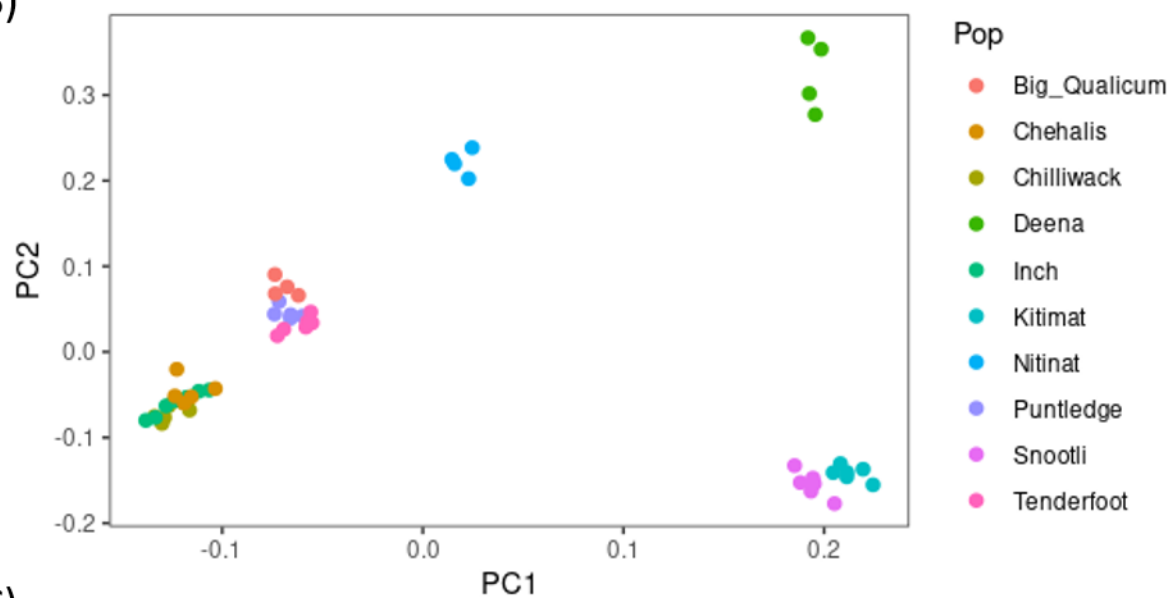

C)

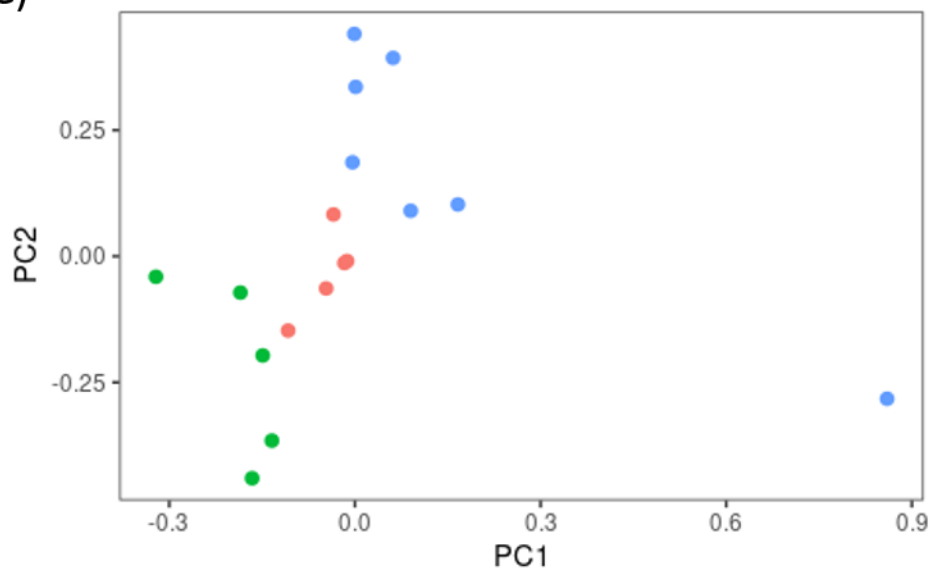



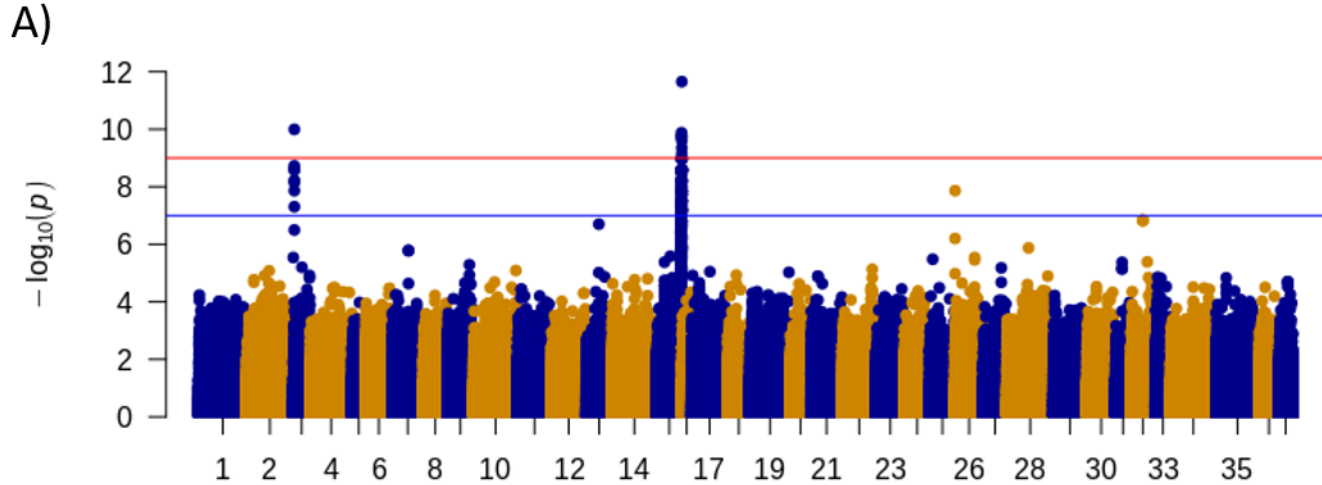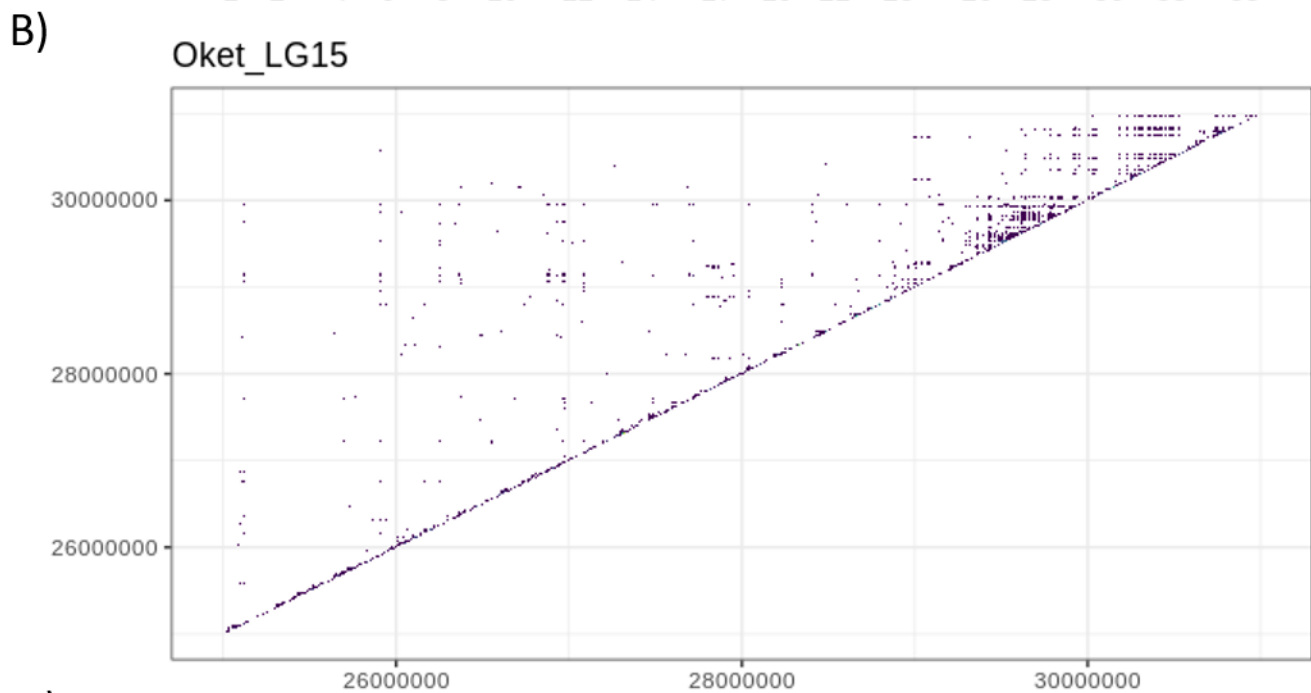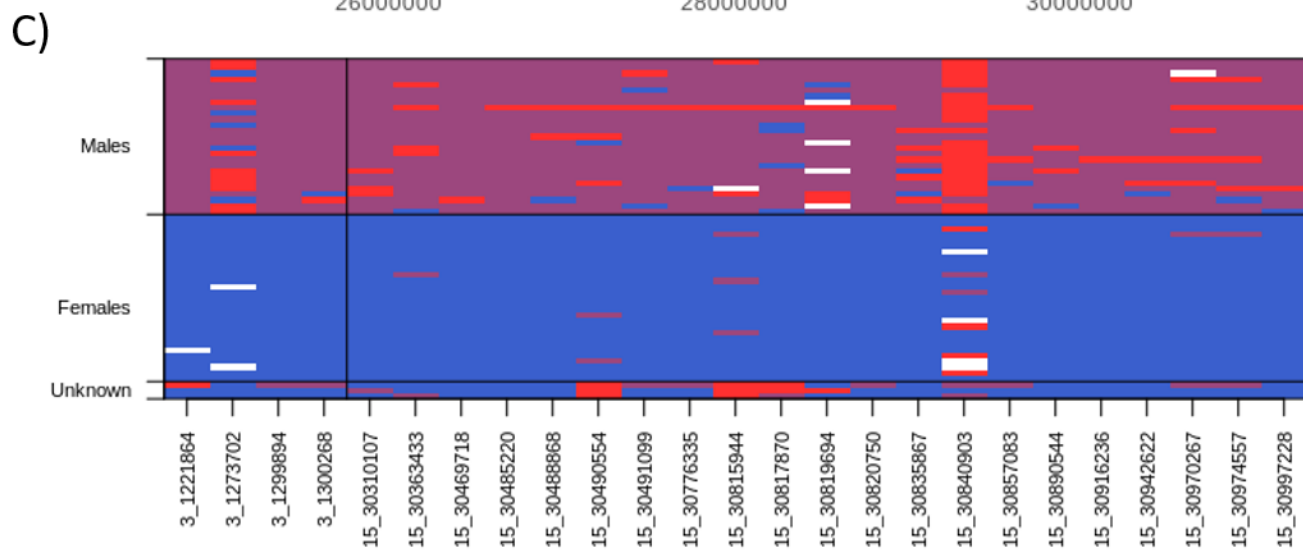

Source: https://www.biorxiv.org/content/10.1101/2021.12.27.474290v1.full.pdf
